# Supplementary material for: Splicing factor SRSF1 is essential for homing of precursor spermatogonial stem cells in mice
Source: bioRxiv preprint, doi:10.1101/2023.06.21.545885, version 5 (2024-01-02)
Supplement: Supplemental Table 7 [file 545885_file09.csv]

Family	Member	Database	Accession	Score	Mass	Num. of matches	Num. of significant matches	Num. of sequences	Num. of significant sequences	emPAI	Description
1	1	Student_Contaminants	luojiayi	13740	85427	298	298	7	7	0.56	luojiayi
2	1	Uniprot_Mouse	Q8VDD5	8825	227429	268	268	81	81	3.79	sp|Q8VDD5|MYH9_MOUSE Myosin-9 OS=Mus musculus GN=Myh9 PE=1 SV=4
2	2	Uniprot_Mouse	Q3UH59	2629	234332	98	98	43	43	1.18	tr|Q3UH59|Q3UH59_MOUSE Myosin-10 OS=Mus musculus GN=Myh10 PE=1 SV=1
2	3	Uniprot_Mouse	O08638	1831	227743	71	71	35	35	0.92	sp|O08638|MYH11_MOUSE Myosin-11 OS=Mus musculus GN=Myh11 PE=1 SV=1
2	4	Uniprot_Mouse	K3W4R2	816	229335	22	22	8	8	0.16	tr|K3W4R2|K3W4R2_MOUSE Myosin-14 OS=Mus musculus GN=Myh14 PE=1 SV=1
3	1	Student_Contaminants	P02769	8176	71244	249	249	37	37	9.1	P02769 SWISS-PROT:P02769 (Bos taurus) Bovine serum albumin precursor
3	2	Uniprot_Mouse	P07724	679	70700	12	12	5	5	0.35	sp|P07724|ALBU_MOUSE Serum albumin OS=Mus musculus GN=Alb PE=1 SV=3
4	1	Student_Contaminants	ENSEMBL:ENSBTAP00000024466	6594	44671	227	227	15	15	3.98	ENSEMBL:ENSBTAP00000024466 (Bos taurus) 44 kDa protein
4	2	Student_Contaminants	ENSEMBL:ENSBTAP00000024462	6062	47028	222	222	17	17	3.58	ENSEMBL:ENSBTAP00000024462 (Bos taurus) 47 kDa protein
5	1	Student_Contaminants	Q1RMN8	5644	24863	124	124	9	9	3.54	Q1RMN8 TREMBL:Q1RMN8 (Bos taurus) Similar to Immunoglobulin lambda-like polypeptide 1
6	1	Uniprot_Mouse	A0A075B5P2	4299	12053	135	135	8	8	20.32	tr|A0A075B5P2|A0A075B5P2_MOUSE Protein Igkc OS=Mus musculus GN=Igkc PE=1 SV=1
6	2	Uniprot_Mouse	P01837	4259	11942	132	132	8	8	20.91	sp|P01837|IGKC_MOUSE Ig kappa chain C region OS=Mus musculus PE=1 SV=1
7	1	Uniprot_Mouse	A0A075B5P3	4134	37284	132	132	13	13	4.43	tr|A0A075B5P3|A0A075B5P3_MOUSE Protein Ighg2b (Fragment) OS=Mus musculus GN=Ighg2b PE=1 SV=1
7	2	Uniprot_Mouse	P01867	3586	44972	117	117	12	12	2.71	sp|P01867|IGG2B_MOUSE Ig gamma-2B chain C region OS=Mus musculus GN=Igh-3 PE=1 SV=3
7	3	Uniprot_Mouse	A0A0A6YY53	2312	37066	84	84	10	10	3.89	tr|A0A0A6YY53|A0A0A6YY53_MOUSE Protein Ighg2c (Fragment) OS=Mus musculus GN=Ighg2c PE=1 SV=1
7	4	Uniprot_Mouse	P01863	518	36936	20	20	2	2	0.41	sp|P01863|GCAA_MOUSE Ig gamma-2A chain C region, A allele OS=Mus musculus GN=Ighg PE=1 SV=1
8	1	Uniprot_Mouse	P60710	4034	42052	135	135	20	20	12.49	sp|P60710|ACTB_MOUSE Actin, cytoplasmic 1 OS=Mus musculus GN=Actb PE=1 SV=1
8	2	Uniprot_Mouse	P68033	2183	42334	98	98	19	19	8.87	sp|P68033|ACTC_MOUSE Actin, alpha cardiac muscle 1 OS=Mus musculus GN=Actc1 PE=1 SV=1
9	1	Student_Contaminants	sp|P38507|SPA_STAAU	3684	55406	100	100	5	5	0.46	sp|P38507|SPA_STAAU Immunoglobulin G-binding protein A OS=Staphylococcus aureus GN=spa PE=1 SV=1
10	1	Uniprot_Mouse	Q62167	3538	73455	122	122	32	32	5.67	sp|Q62167|DDX3X_MOUSE ATP-dependent RNA helicase DDX3X OS=Mus musculus GN=Ddx3x PE=1 SV=3
10	2	Uniprot_Mouse	Q62095	2872	73838	101	101	30	30	4.9	sp|Q62095|DDX3Y_MOUSE ATP-dependent RNA helicase DDX3Y OS=Mus musculus GN=Ddx3y PE=1 SV=2
10	3	Uniprot_Mouse	Q61656	1386	69760	47	47	19	19	2.16	sp|Q61656|DDX5_MOUSE Probable ATP-dependent RNA helicase DDX5 OS=Mus musculus GN=Ddx5 PE=1 SV=2
10	4	Uniprot_Mouse	Q3U741	910	73166	36	36	17	17	1.67	tr|Q3U741|Q3U741_MOUSE DEAD (Asp-Glu-Ala-Asp) box polypeptide 17, isoform CRA_a OS=Mus musculus GN=Ddx17 PE=1 SV=1
11	1	Uniprot_Mouse	P99024	3341	50095	99	99	21	21	8.72	sp|P99024|TBB5_MOUSE Tubulin beta-5 chain OS=Mus musculus GN=Tubb5 PE=1 SV=1
11	2	Uniprot_Mouse	P68372	2949	50255	88	88	20	20	7.85	sp|P68372|TBB4B_MOUSE Tubulin beta-4B chain OS=Mus musculus GN=Tubb4b PE=1 SV=1
11	3	Uniprot_Mouse	Q9CWF2	2416	50377	77	77	17	17	5.3	sp|Q9CWF2|TBB2B_MOUSE Tubulin beta-2B chain OS=Mus musculus GN=Tubb2b PE=1 SV=1
11	4	Uniprot_Mouse	Q922F4	1276	50514	37	37	10	10	1.96	sp|Q922F4|TBB6_MOUSE Tubulin beta-6 chain OS=Mus musculus GN=Tubb6 PE=1 SV=1
12	1	Uniprot_Mouse	Q8VHM5	2772	71129	104	104	22	22	2.92	tr|Q8VHM5|Q8VHM5_MOUSE Heterogeneous nuclear ribonucleoprotein R OS=Mus musculus GN=Hnrnpr PE=1 SV=1
12	2	Uniprot_Mouse	Q7TMK9	1816	69818	72	72	23	23	3.27	sp|Q7TMK9|HNRPQ_MOUSE Heterogeneous nuclear ribonucleoprotein Q OS=Mus musculus GN=Syncrip PE=1 SV=2
13	1	Uniprot_Mouse	A0A075B5P5	2428	36743	88	88	11	11	3.43	tr|A0A075B5P5|A0A075B5P5_MOUSE Protein Ighg3 (Fragment) OS=Mus musculus GN=Ighg3 PE=4 SV=1
14	1	Uniprot_Mouse	Q6PDM2	2396	27842	79	79	11	11	4.23	sp|Q6PDM2|SRSF1_MOUSE Serine/arginine-rich splicing factor 1 OS=Mus musculus GN=Srsf1 PE=1 SV=3
14	2	Uniprot_Mouse	Q9D0B0	425	25759	18	18	6	6	2.12	sp|Q9D0B0|SRSF9_MOUSE Serine/arginine-rich splicing factor 9 OS=Mus musculus GN=Srsf9 PE=1 SV=1
15	1	Student_Contaminants	ENSEMBL:ENSBTAP00000031900	2282	122348	62	62	22	22	1.22	ENSEMBL:ENSBTAP00000031900 (Bos taurus) 121 kDa protein
16	1	Uniprot_Mouse	P61979	2210	51230	62	62	14	14	2.16	sp|P61979|HNRPK_MOUSE Heterogeneous nuclear ribonucleoprotein K OS=Mus musculus GN=Hnrnpk PE=1 SV=1
17	1	Uniprot_Mouse	Q8C2Q3	2095	69577	65	65	19	19	2.37	sp|Q8C2Q3|RBM14_MOUSE RNA-binding protein 14 OS=Mus musculus GN=Rbm14 PE=1 SV=1
17	2	Uniprot_Mouse	F7BGR7	936	53442	33	33	14	14	2.02	tr|F7BGR7|F7BGR7_MOUSE Protein Gm21992 OS=Mus musculus GN=Gm21992 PE=1 SV=1
17	3	Uniprot_Mouse	Q8VE92	750	40308	24	24	13	13	2.89	sp|Q8VE92|RBM4B_MOUSE RNA-binding protein 4B OS=Mus musculus GN=Rbm4b PE=1 SV=1
18	1	Uniprot_Mouse	A0A075B5P4	1936	36292	57	57	10	10	3.01	tr|A0A075B5P4|A0A075B5P4_MOUSE Ig gamma-1 chain C region secreted form (Fragment) OS=Mus musculus GN=Ighg1 PE=1 SV=1
19	1	Uniprot_Mouse	A2AIX1	1819	257683	80	80	43	43	1.03	tr|A2AIX1|A2AIX1_MOUSE Protein Sec16a OS=Mus musculus GN=Sec16a PE=1 SV=1
20	1	Uniprot_Mouse	D3YTQ3	1752	46413	66	66	17	17	4.62	tr|D3YTQ3|D3YTQ3_MOUSE Heterogeneous nuclear ribonucleoprotein D-like OS=Mus musculus GN=Hnrnpdl PE=1 SV=1
20	2	Uniprot_Mouse	F6ZV59	1038	24878	37	37	11	11	6.53	tr|F6ZV59|F6ZV59_MOUSE Heterogeneous nuclear ribonucleoprotein D0 (Fragment) OS=Mus musculus GN=Hnrnpd PE=1 SV=1
20	3	Uniprot_Mouse	Q20BD0	456	36302	14	14	8	8	1.53	tr|Q20BD0|Q20BD0_MOUSE Heterogeneous nuclear ribonucleoprotein A/B OS=Mus musculus GN=Hnrnpab PE=1 SV=1
21	1	Uniprot_Mouse	G3XA10	1595	87607	52	52	15	15	1.27	tr|G3XA10|G3XA10_MOUSE Heterogeneous nuclear ribonucleoprotein U, isoform CRA_b OS=Mus musculus GN=Gm28062 PE=4 SV=1
22	1	Uniprot_Mouse	Q00PI9	1519	85515	51	51	20	20	1.97	sp|Q00PI9|HNRL2_MOUSE Heterogeneous nuclear ribonucleoprotein U-like protein 2 OS=Mus musculus GN=Hnrnpul2 PE=1 SV=2
23	1	Uniprot_Mouse	Q8C2Q7	1478	51470	52	52	12	12	1.67	tr|Q8C2Q7|Q8C2Q7_MOUSE Heterogeneous nuclear ribonucleoprotein H OS=Mus musculus GN=Hnrnph1 PE=1 SV=1
23	2	Uniprot_Mouse	P70333	828	49533	28	28	9	9	1.15	sp|P70333|HNRH2_MOUSE Heterogeneous nuclear ribonucleoprotein H2 OS=Mus musculus GN=Hnrnph2 PE=2 SV=1
23	3	Uniprot_Mouse	Q9Z2X1	712	46043	26	26	7	7	0.9	sp|Q9Z2X1|HNRPF_MOUSE Heterogeneous nuclear ribonucleoprotein F OS=Mus musculus GN=Hnrnpf PE=1 SV=3
23	4	Uniprot_Mouse	D3YWT1	630	35216	24	24	8	8	1.6	tr|D3YWT1|D3YWT1_MOUSE MCG11326, isoform CRA_b OS=Mus musculus GN=Hnrnph3 PE=1 SV=1
24	1	Uniprot_Mouse	Q8BH97	1394	37978	32	32	6	6	1.17	sp|Q8BH97|RCN3_MOUSE Reticulocalbin-3 OS=Mus musculus GN=Rcn3 PE=2 SV=1
25	1	Uniprot_Mouse	A2AL12	1340	34683	36	36	9	9	1.98	tr|A2AL12|A2AL12_MOUSE Heterogeneous nuclear ribonucleoprotein A3 OS=Mus musculus GN=Hnrnpa3 PE=1 SV=1
25	2	Uniprot_Mouse	Q9CX86	637	30683	22	22	8	8	1.99	sp|Q9CX86|ROA0_MOUSE Heterogeneous nuclear ribonucleoprotein A0 OS=Mus musculus GN=Hnrnpa0 PE=1 SV=1
25	3	Uniprot_Mouse	O88569	362	37437	16	16	7	7	1.2	sp|O88569|ROA2_MOUSE Heterogeneous nuclear ribonucleoproteins A2/B1 OS=Mus musculus GN=Hnrnpa2b1 PE=1 SV=2
25	4	Uniprot_Mouse	P49312	233	34289	10	10	5	5	0.84	sp|P49312|ROA1_MOUSE Heterogeneous nuclear ribonucleoprotein A1 OS=Mus musculus GN=Hnrnpa1 PE=1 SV=2
26	1	Uniprot_Mouse	P68369	1220	50788	42	42	14	14	2.19	sp|P68369|TBA1A_MOUSE Tubulin alpha-1A chain OS=Mus musculus GN=Tuba1a PE=1 SV=1
26	2	Uniprot_Mouse	P05213	1198	50804	41	41	13	13	1.94	sp|P05213|TBA1B_MOUSE Tubulin alpha-1B chain OS=Mus musculus GN=Tuba1b PE=1 SV=2
26	3	Uniprot_Mouse	Q3UX10	229	50697	8	8	3	3	0.28	sp|Q3UX10|TBAL3_MOUSE Tubulin alpha chain-like 3 OS=Mus musculus GN=Tubal3 PE=2 SV=2
27	1	Student_Contaminants	Q05B55	1205	26859	32	32	10	10	3.75	Q05B55 TREMBL:Q05B55 (Bos taurus) Similar to Ig kappa chain C region
28	1	Student_Contaminants	P04264	1165	66149	35	35	14	14	1.44	P04264 SWISS-PROT:P04264 Tax_Id=9606 Gene_Symbol=KRT1 Keratin, type II cytoskeletal 1
28	2	Student_Contaminants	P35908	269	66110	14	14	11	11	1.02	P35908 SWISS-PROT:P35908 Tax_Id=9606 Gene_Symbol=KRT2 Keratin, type II cytoskeletal 2 epidermal
28	3	Student_Contaminants	P13647	141	62568	8	8	8	8	0.72	P13647 SWISS-PROT:P13647 Tax_Id=9606 Gene_Symbol=KRT5 Keratin, type II cytoskeletal 5
29	1	Uniprot_Mouse	Q8BTI8	1094	295521	45	45	27	27	0.5	sp|Q8BTI8|SRRM2_MOUSE Serine/arginine repetitive matrix protein 2 OS=Mus musculus GN=Srrm2 PE=1 SV=3
29	2	Uniprot_Mouse	A0A087WRX8	53	19741	5	5	3	3	0.88	tr|A0A087WRX8|A0A087WRX8_MOUSE Serine/arginine repetitive matrix protein 2 (Fragment) OS=Mus musculus GN=Srrm2 PE=1 SV=1
30	1	Uniprot_Mouse	G5E924	1086	67575	30	30	13	13	1.25	tr|G5E924|G5E924_MOUSE Heterogeneous nuclear ribonucleoprotein L (Fragment) OS=Mus musculus GN=Hnrnpl PE=1 SV=1
31	1	Uniprot_Mouse	Q6P4T2	957	246045	43	43	33	33	0.77	sp|Q6P4T2|U520_MOUSE U5 small nuclear ribonucleoprotein 200 kDa helicase OS=Mus musculus GN=Snrnp200 PE=1 SV=1
32	1	Uniprot_Mouse	Q6ZWQ9	915	19940	26	26	6	6	3.3	tr|Q6ZWQ9|Q6ZWQ9_MOUSE MCG5400 OS=Mus musculus GN=Myl12a PE=1 SV=1
32	2	Uniprot_Mouse	Q9CQ19	710	19898	20	20	5	5	2.52	sp|Q9CQ19|MYL9_MOUSE Myosin regulatory light polypeptide 9 OS=Mus musculus GN=Myl9 PE=1 SV=3
33	1	Uniprot_Mouse	Q99PV0	887	274754	51	51	41	41	0.88	sp|Q99PV0|PRP8_MOUSE Pre-mRNA-processing-splicing factor 8 OS=Mus musculus GN=Prpf8 PE=1 SV=2
34	1	Uniprot_Mouse	Q60605	825	17090	24	24	7	7	4.48	sp|Q60605|MYL6_MOUSE Myosin light polypeptide 6 OS=Mus musculus GN=Myl6 PE=1 SV=3
34	2	Uniprot_Mouse	Q8CI43	186	22849	5	5	2	2	0.44	sp|Q8CI43|MYL6B_MOUSE Myosin light chain 6B OS=Mus musculus GN=Myl6b PE=2 SV=1
35	1	Uniprot_Mouse	G3V004	763	19282	19	19	3	3	0.91	tr|G3V004|G3V004_MOUSE Calumenin OS=Mus musculus GN=Calu PE=1 SV=1
36	1	Uniprot_Mouse	Q9D8E6	733	47409	28	28	14	14	2.47	sp|Q9D8E6|RL4_MOUSE 60S ribosomal protein L4 OS=Mus musculus GN=Rpl4 PE=1 SV=3
37	1	Uniprot_Mouse	P97315	719	21425	23	23	7	7	3.75	sp|P97315|CSRP1_MOUSE Cysteine and glycine-rich protein 1 OS=Mus musculus GN=Csrp1 PE=1 SV=3
38	1	Uniprot_Mouse	P12970	696	30129	23	23	12	12	4.33	sp|P12970|RL7A_MOUSE 60S ribosomal protein L7a OS=Mus musculus GN=Rpl7a PE=1 SV=2
39	1	Uniprot_Mouse	A0A075B5Y4	616	13094	12	12	4	4	2.52	tr|A0A075B5Y4|A0A075B5Y4_MOUSE Protein Ighv1-81 OS=Mus musculus GN=Ighv1-81 PE=4 SV=1
39	2	Uniprot_Mouse	A0A075B5V0	568	13016	14	14	4	4	2.56	tr|A0A075B5V0|A0A075B5V0_MOUSE MCG114299 (Fragment) OS=Mus musculus GN=Ighv1-26 PE=4 SV=1
39	3	Uniprot_Mouse	A0A075B5U7	539	13127	13	13	3	3	1.57	tr|A0A075B5U7|A0A075B5U7_MOUSE Protein Ighv1-22 (Fragment) OS=Mus musculus GN=Ighv1-22 PE=4 SV=1
39	4	Uniprot_Mouse	A0A075B5V6	433	10883	13	13	5	5	5.58	tr|A0A075B5V6|A0A075B5V6_MOUSE Protein Ighv1-42 OS=Mus musculus GN=Ighv1-42 PE=4 SV=1
39	5	Uniprot_Mouse	A0A075B5V7	347	10868	11	11	4	4	3.51	tr|A0A075B5V7|A0A075B5V7_MOUSE Protein Ighv1-43 OS=Mus musculus GN=Ighv1-43 PE=4 SV=1
39	6	Uniprot_Mouse	A0A0A6YXA5	298	13058	7	7	3	3	1.57	tr|A0A0A6YXA5|A0A0A6YXA5_MOUSE MCG114298 (Fragment) OS=Mus musculus GN=Ighv1-15 PE=4 SV=1
39	7	Uniprot_Mouse	A0A0A6YXN4	275	13018	7	7	3	3	1.59	tr|A0A0A6YXN4|A0A0A6YXN4_MOUSE Protein Ighv1-18 (Fragment) OS=Mus musculus GN=Ighv1-18 PE=4 SV=1
39	8	Uniprot_Mouse	A0A0B4J1N0	125	10986	5	5	3	3	2.06	tr|A0A0B4J1N0|A0A0B4J1N0_MOUSE Protein Ighv1-76 OS=Mus musculus GN=Ighv1-76 PE=4 SV=1
39	9	Uniprot_Mouse	A0A0B4J1M0	123	10769	5	5	3	3	2.13	tr|A0A0B4J1M0|A0A0B4J1M0_MOUSE Protein Ighv1-77 OS=Mus musculus GN=Ighv1-77 PE=1 SV=1
39	10	Uniprot_Mouse	A0A075B5Y1	54	13062	2	2	2	2	0.88	tr|A0A075B5Y1|A0A075B5Y1_MOUSE Protein Ighv1-74 OS=Mus musculus GN=Ighv1-74 PE=4 SV=1
39	11	Uniprot_Mouse	A0A075B5W2	33	13151	2	2	2	2	0.88	tr|A0A075B5W2|A0A075B5W2_MOUSE Protein Ighv1-52 OS=Mus musculus GN=Ighv1-52 PE=4 SV=1
40	1	Uniprot_Mouse	P20152	642	53712	21	21	13	13	1.78	sp|P20152|VIME_MOUSE Vimentin OS=Mus musculus GN=Vim PE=1 SV=3
40	2	Uniprot_Mouse	P46660	21	55520	2	2	2	2	0.16	sp|P46660|AINX_MOUSE Alpha-internexin OS=Mus musculus GN=Ina PE=1 SV=3
41	1	Student_Contaminants	ENSEMBL:ENSBTAP00000014147	626	11863	18	18	4	4	2.99	ENSEMBL:ENSBTAP00000014147 (Bos taurus) 12 kDa protein
42	1	Uniprot_Mouse	Q3V1Z5	609	29394	22	22	10	10	3.16	tr|Q3V1Z5|Q3V1Z5_MOUSE 40S ribosomal protein S4 OS=Mus musculus GN=Rps4l PE=1 SV=1
42	2	Uniprot_Mouse	P62702	546	29807	22	22	10	10	3.07	sp|P62702|RS4X_MOUSE 40S ribosomal protein S4, X isoform OS=Mus musculus GN=Rps4x PE=2 SV=2
43	1	Uniprot_Mouse	O88291	595	65641	18	18	8	8	0.67	sp|O88291|ZN326_MOUSE DBIRD complex subunit ZNF326 OS=Mus musculus GN=Znf326 PE=2 SV=1
44	1	Uniprot_Mouse	P10126	594	50424	19	19	8	8	0.95	sp|P10126|EF1A1_MOUSE Elongation factor 1-alpha 1 OS=Mus musculus GN=Eef1a1 PE=1 SV=3
45	1	Uniprot_Mouse	F8WJG3	592	22036	15	15	4	4	1.13	tr|F8WJG3|F8WJG3_MOUSE Transformer-2 protein homolog beta OS=Mus musculus GN=Tra2b PE=1 SV=1
46	1	Uniprot_Mouse	Q62376	584	52018	28	28	8	8	0.91	sp|Q62376|RU17_MOUSE U1 small nuclear ribonucleoprotein 70 kDa OS=Mus musculus GN=Snrnp70 PE=1 SV=2
47	1	Uniprot_Mouse	P62242	583	24475	15	15	7	7	2.32	sp|P62242|RS8_MOUSE 40S ribosomal protein S8 OS=Mus musculus GN=Rps8 PE=1 SV=2
48	1	Uniprot_Mouse	A2AFI3	550	32685	17	17	7	7	1.46	tr|A2AFI3|A2AFI3_MOUSE RNA binding motif protein, X chromosome, isoform CRA_b OS=Mus musculus GN=Rbmx PE=1 SV=1
48	2	Uniprot_Mouse	Q91VM5	505	42136	15	15	6	6	0.82	sp|Q91VM5|RMXL1_MOUSE RNA binding motif protein, X-linked-like-1 OS=Mus musculus GN=Rbmxl1 PE=2 SV=1
48	3	Uniprot_Mouse	D3YXK2	303	105553	13	13	7	7	0.32	sp|D3YXK2|SAFB1_MOUSE Scaffold attachment factor B1 OS=Mus musculus GN=Safb PE=1 SV=2
49	1	Uniprot_Mouse	P51410	546	21982	22	22	8	8	3.57	sp|P51410|RL9_MOUSE 60S ribosomal protein L9 OS=Mus musculus GN=Rpl9 PE=1 SV=2
50	1	Uniprot_Mouse	P01631	528	12379	9	9	3	3	1.7	sp|P01631|KV2A7_MOUSE Ig kappa chain V-II region 26-10 OS=Mus musculus PE=1 SV=1
51	1	Uniprot_Mouse	Q9Z204	490	34421	19	19	7	7	1.35	sp|Q9Z204|HNRPC_MOUSE Heterogeneous nuclear ribonucleoproteins C1/C2 OS=Mus musculus GN=Hnrnpc PE=1 SV=1
52	1	Uniprot_Mouse	E9QN08	479	27258	10	10	7	7	1.93	tr|E9QN08|E9QN08_MOUSE Elongation factor 1-delta (Fragment) OS=Mus musculus GN=Eef1d PE=1 SV=1
52	2	Uniprot_Mouse	F6ZFU0	355	61924	9	9	7	7	0.61	tr|F6ZFU0|F6ZFU0_MOUSE Elongation factor 1-delta (Fragment) OS=Mus musculus GN=Eef1d PE=1 SV=1
53	1	Uniprot_Mouse	Q60749	468	48511	24	24	10	10	1.6	sp|Q60749|KHDR1_MOUSE KH domain-containing, RNA-binding, signal transduction-associated protein 1 OS=Mus musculus GN=Khdrbs1 PE=1 SV=2
53	2	Uniprot_Mouse	Q9R226	325	38784	14	14	4	4	0.72	sp|Q9R226|KHDR3_MOUSE KH domain-containing, RNA-binding, signal transduction-associated protein 3 OS=Mus musculus GN=Khdrbs3 PE=1 SV=1
54	1	Uniprot_Mouse	D3Z2H2	443	99337	26	26	19	19	1.25	tr|D3Z2H2|D3Z2H2_MOUSE Catenin delta-1 OS=Mus musculus GN=Ctnnd1 PE=1 SV=1
55	1	Uniprot_Mouse	P27659	432	46366	19	19	10	10	1.48	sp|P27659|RL3_MOUSE 60S ribosomal protein L3 OS=Mus musculus GN=Rpl3 PE=1 SV=3
56	1	Student_Contaminants	P00761	419	25078	18	18	2	2	0.4	P00761 SWISS-PROT:P00761|TRYP_PIG Trypsin - Sus scrofa (Pig).
57	1	Uniprot_Mouse	A0A0A0MQF6	419	38914	14	14	8	8	1.37	tr|A0A0A0MQF6|A0A0A0MQF6_MOUSE Glyceraldehyde-3-phosphate dehydrogenase OS=Mus musculus GN=Gapdh PE=1 SV=1
58	1	Uniprot_Mouse	P62717	413	21004	13	13	6	6	2.3	sp|P62717|RL18A_MOUSE 60S ribosomal protein L18a OS=Mus musculus GN=Rpl18a PE=1 SV=1
59	1	Uniprot_Mouse	P14115	407	16709	10	10	4	4	1.69	sp|P14115|RL27A_MOUSE 60S ribosomal protein L27a OS=Mus musculus GN=Rpl27a PE=2 SV=5
60	1	Uniprot_Mouse	P47963	399	24348	15	15	5	5	1.81	sp|P47963|RL13_MOUSE 60S ribosomal protein L13 OS=Mus musculus GN=Rpl13 PE=2 SV=3
61	1	Student_Contaminants	P35527	396	62320	15	15	9	9	0.84	P35527 SWISS-PROT:P35527 Tax_Id=9606 Gene_Symbol=KRT9 Keratin, type I cytoskeletal 9
61	2	Student_Contaminants	P13645	372	59703	19	19	9	9	0.89	P13645 SWISS-PROT:P13645 Tax_Id=9606 Gene_Symbol=KRT10 Keratin, type I cytoskeletal 10
61	3	Student_Contaminants	P02533	193	51875	9	9	4	4	0.38	P02533 SWISS-PROT:P02533 Tax_Id=9606 Gene_Symbol=KRT14 Keratin, type I cytoskeletal 14
62	1	Uniprot_Mouse	P97873	390	67149	15	15	9	9	0.76	sp|P97873|LOXL1_MOUSE Lysyl oxidase homolog 1 OS=Mus musculus GN=Loxl1 PE=2 SV=3
63	1	Uniprot_Mouse	P62301	383	17212	20	20	8	8	5.9	sp|P62301|RS13_MOUSE 40S ribosomal protein S13 OS=Mus musculus GN=Rps13 PE=1 SV=2
64	1	Uniprot_Mouse	P35980	381	21688	8	8	3	3	0.78	sp|P35980|RL18_MOUSE 60S ribosomal protein L18 OS=Mus musculus GN=Rpl18 PE=2 SV=3
65	1	Uniprot_Mouse	Q9CR57	369	23663	11	11	4	4	1.03	sp|Q9CR57|RL14_MOUSE 60S ribosomal protein L14 OS=Mus musculus GN=Rpl14 PE=1 SV=3
66	1	Uniprot_Mouse	A0A075B5T2	362	13479	16	16	5	5	3.65	tr|A0A075B5T2|A0A075B5T2_MOUSE Protein Ighv6-3 (Fragment) OS=Mus musculus GN=Ighv6-3 PE=4 SV=4
66	2	Uniprot_Mouse	P01796	140	12781	6	6	3	3	1.63	sp|P01796|HVM27_MOUSE Ig heavy chain V-III region A4 OS=Mus musculus PE=1 SV=1
66	3	Uniprot_Mouse	A0A0A6YWU3	72	13935	3	3	2	2	0.81	tr|A0A0A6YWU3|A0A0A6YWU3_MOUSE Protein Ighv13-2 (Fragment) OS=Mus musculus GN=Ighv6-7 PE=4 SV=1
67	1	Student_Contaminants	ENSEMBL:ENSBTAP00000033053	361	14978	9	9	2	2	0.74	ENSEMBL:ENSBTAP00000033053 (Bos taurus) 15 kDa protein
68	1	Uniprot_Mouse	A2AFQ9	361	169039	25	25	19	19	0.61	tr|A2AFQ9|A2AFQ9_MOUSE Gem-associated protein 5 OS=Mus musculus GN=Gemin5 PE=1 SV=1
69	1	Uniprot_Mouse	P35979	352	17965	9	9	5	5	2.18	sp|P35979|RL12_MOUSE 60S ribosomal protein L12 OS=Mus musculus GN=Rpl12 PE=1 SV=2
70	1	Uniprot_Mouse	Q9D8S5	341	31074	11	11	6	6	1.25	tr|Q9D8S5|Q9D8S5_MOUSE MCG7614, isoform CRA_c OS=Mus musculus GN=Srsf5 PE=1 SV=1
71	1	Uniprot_Mouse	E9Q983	334	199774	12	12	11	11	0.26	tr|E9Q983|E9Q983_MOUSE Supervillin OS=Mus musculus GN=Svil PE=1 SV=1
72	1	Uniprot_Mouse	P62852	329	13791	13	13	5	5	3.48	sp|P62852|RS25_MOUSE 40S ribosomal protein S25 OS=Mus musculus GN=Rps25 PE=1 SV=1
73	1	Uniprot_Mouse	A0A0B4J1E2	328	61481	12	12	8	8	0.73	tr|A0A0B4J1E2|A0A0B4J1E2_MOUSE SNW domain-containing protein 1 OS=Mus musculus GN=Snw1 PE=1 SV=1
74	1	Uniprot_Mouse	Q9CZU3	326	118588	13	13	9	9	0.38	sp|Q9CZU3|SK2L2_MOUSE Superkiller viralicidic activity 2-like 2 OS=Mus musculus GN=Skiv2l2 PE=1 SV=1
75	1	Uniprot_Mouse	Q99KP6	326	55661	14	14	8	8	0.83	sp|Q99KP6|PRP19_MOUSE Pre-mRNA-processing factor 19 OS=Mus musculus GN=Prpf19 PE=1 SV=1
76	1	Uniprot_Mouse	Q91VR5	321	83474	20	20	16	16	1.25	sp|Q91VR5|DDX1_MOUSE ATP-dependent RNA helicase DDX1 OS=Mus musculus GN=Ddx1 PE=1 SV=1
77	1	Uniprot_Mouse	Q05186	319	38090	14	14	7	7	1.17	sp|Q05186|RCN1_MOUSE Reticulocalbin-1 OS=Mus musculus GN=Rcn1 PE=1 SV=1
78	1	Uniprot_Mouse	A2AH85	316	110392	19	19	15	15	0.78	tr|A2AH85|A2AH85_MOUSE 116 kDa U5 small nuclear ribonucleoprotein component OS=Mus musculus GN=Eftud2 PE=1 SV=1
79	1	Uniprot_Mouse	P61358	315	15788	12	12	4	4	1.86	sp|P61358|RL27_MOUSE 60S ribosomal protein L27 OS=Mus musculus GN=Rpl27 PE=1 SV=2
80	1	Uniprot_Mouse	P62281	311	18590	13	13	7	7	3.81	sp|P62281|RS11_MOUSE 40S ribosomal protein S11 OS=Mus musculus GN=Rps11 PE=1 SV=3
81	1	Uniprot_Mouse	D3YVC1	308	28868	11	11	5	5	1.07	tr|D3YVC1|D3YVC1_MOUSE 40S ribosomal protein S2 (Fragment) OS=Mus musculus GN=Rps2 PE=1 SV=1
82	1	Uniprot_Mouse	P62983	308	18282	7	7	2	2	0.57	sp|P62983|RS27A_MOUSE Ubiquitin-40S ribosomal protein S27a OS=Mus musculus GN=Rps27a PE=1 SV=2
83	1	Uniprot_Mouse	P70372	307	36317	9	9	6	6	1.25	sp|P70372|ELAV1_MOUSE ELAV-like protein 1 OS=Mus musculus GN=Elavl1 PE=1 SV=2
84	1	Uniprot_Mouse	A0A0B4J1I9	306	12842	3	3	2	2	0.9	tr|A0A0B4J1I9|A0A0B4J1I9_MOUSE Protein Igkv4-55 OS=Mus musculus GN=Igkv4-55 PE=1 SV=1
85	1	Uniprot_Mouse	A0A0B4J1H7	305	13411	6	6	2	2	0.85	tr|A0A0B4J1H7|A0A0B4J1H7_MOUSE Protein Igkv1-135 OS=Mus musculus GN=Igkv1-135 PE=4 SV=1
86	1	Uniprot_Mouse	D3YUT3	298	14887	11	11	7	7	6.01	tr|D3YUT3|D3YUT3_MOUSE 40S ribosomal protein S19 (Fragment) OS=Mus musculus GN=Rps19 PE=1 SV=2
87	1	Uniprot_Mouse	A8DUK4	297	15795	13	13	7	7	5.3	tr|A8DUK4|A8DUK4_MOUSE Beta-globin OS=Mus musculus GN=Hbbt1 PE=1 SV=1
88	1	Uniprot_Mouse	P01644	287	12017	7	7	2	2	0.99	sp|P01644|KV5AB_MOUSE Ig kappa chain V-V region HP R16.7 OS=Mus musculus PE=1 SV=1
88	2	Uniprot_Mouse	P01643	186	11925	3	3	2	2	1	sp|P01643|KV5AA_MOUSE Ig kappa chain V-V region MOPC 173 OS=Mus musculus PE=1 SV=1
89	1	Uniprot_Mouse	P51881	287	33138	15	15	9	9	2.12	sp|P51881|ADT2_MOUSE ADP/ATP translocase 2 OS=Mus musculus GN=Slc25a5 PE=1 SV=3
89	2	Uniprot_Mouse	P48962	143	33111	8	8	5	5	0.89	sp|P48962|ADT1_MOUSE ADP/ATP translocase 1 OS=Mus musculus GN=Slc25a4 PE=1 SV=4
90	1	Uniprot_Mouse	F6XI62	276	32564	14	14	10	10	2.64	tr|F6XI62|F6XI62_MOUSE 60S ribosomal protein L7 (Fragment) OS=Mus musculus GN=Rpl7 PE=1 SV=1
91	1	Uniprot_Mouse	O88532	275	117926	13	13	10	10	0.43	sp|O88532|ZFR_MOUSE Zinc finger RNA-binding protein OS=Mus musculus GN=Zfr PE=1 SV=2
92	1	Uniprot_Mouse	K3W4R4	275	194217	14	14	11	11	0.27	tr|K3W4R4|K3W4R4_MOUSE Collagen alpha-1(XIV) chain OS=Mus musculus GN=Col14a1 PE=1 SV=1
93	1	Uniprot_Mouse	Q5SQB0	274	29677	13	13	5	5	1.03	tr|Q5SQB0|Q5SQB0_MOUSE Nucleophosmin OS=Mus musculus GN=Npm1 PE=1 SV=1
94	1	Uniprot_Mouse	P01635	271	12744	8	8	4	4	2.64	sp|P01635|KV5A3_MOUSE Ig kappa chain V-V region K2 (Fragment) OS=Mus musculus PE=1 SV=1
95	1	Uniprot_Mouse	Q8VH51	268	59655	10	10	5	5	0.42	sp|Q8VH51|RBM39_MOUSE RNA-binding protein 39 OS=Mus musculus GN=Rbm39 PE=1 SV=2
96	1	Uniprot_Mouse	A0A0B4J1H6	267	13294	5	5	2	2	0.86	tr|A0A0B4J1H6|A0A0B4J1H6_MOUSE Protein Igkv2-137 OS=Mus musculus GN=Igkv2-137 PE=4 SV=1
97	1	Student_Contaminants	P02672	266	67484	8	8	4	4	0.28	P02672 SWISS-PROT:P02672 (Bos taurus) Fibrinogen alpha chain precursor
98	1	Uniprot_Mouse	Q8BYK6	266	64036	9	9	6	6	0.49	sp|Q8BYK6|YTHD3_MOUSE YTH domain-containing family protein 3 OS=Mus musculus GN=Ythdf3 PE=1 SV=2
99	1	Uniprot_Mouse	Q9CQM8	265	18624	11	11	3	3	0.95	tr|Q9CQM8|Q9CQM8_MOUSE 60S ribosomal protein L21 OS=Mus musculus GN=Rpl21 PE=1 SV=1
100	1	Student_Contaminants	ENSEMBL:ENSBTAP00000011227	264	14791	6	6	2	2	0.75	ENSEMBL:ENSBTAP00000011227 (Bos taurus) 15 kDa protein
101	1	Uniprot_Mouse	P97351	261	30094	12	12	5	5	1.01	sp|P97351|RS3A_MOUSE 40S ribosomal protein S3a OS=Mus musculus GN=Rps3a PE=1 SV=3
102	1	Uniprot_Mouse	B8JK32	259	72250	16	16	12	12	1.02	tr|B8JK32|B8JK32_MOUSE Heterogeneous nuclear ribonucleoprotein M OS=Mus musculus GN=Hnrnpm PE=1 SV=1
103	1	Uniprot_Mouse	O70209	258	34734	11	11	7	7	1.33	sp|O70209|PDLI3_MOUSE PDZ and LIM domain protein 3 OS=Mus musculus GN=Pdlim3 PE=1 SV=1
104	1	Uniprot_Mouse	P62911	257	15964	10	10	6	6	3.74	sp|P62911|RL32_MOUSE 60S ribosomal protein L32 OS=Mus musculus GN=Rpl32 PE=1 SV=2
105	1	Uniprot_Mouse	P62918	256	28235	11	11	4	4	0.81	sp|P62918|RL8_MOUSE 60S ribosomal protein L8 OS=Mus musculus GN=Rpl8 PE=1 SV=2
106	1	Uniprot_Mouse	Q3TFP0	256	22236	9	9	4	4	1.12	tr|Q3TFP0|Q3TFP0_MOUSE Serine/arginine-rich-splicing factor 10 OS=Mus musculus GN=Srsf10 PE=1 SV=1
107	1	Uniprot_Mouse	G5E866	255	146479	14	14	10	10	0.34	tr|G5E866|G5E866_MOUSE Splicing factor 3B subunit 1 OS=Mus musculus GN=Sf3b1 PE=1 SV=1
108	1	Uniprot_Mouse	P03977	250	12149	6	6	3	3	1.77	sp|P03977|KV3A4_MOUSE Ig kappa chain V-III region 50S10.1 OS=Mus musculus PE=1 SV=1
108	2	Uniprot_Mouse	P01662	228	12148	5	5	2	2	0.97	sp|P01662|KV3AA_MOUSE Ig kappa chain V-III region ABPC 22/PC 9245 OS=Mus musculus PE=1 SV=1
108	3	Uniprot_Mouse	P01633	195	16537	11	11	4	4	2.51	sp|P01633|KV5A1_MOUSE Ig kappa chain V19-17 OS=Mus musculus GN=Igk-V19-17 PE=1 SV=1
108	4	Uniprot_Mouse	A0A075B5N9	159	11060	4	4	2	2	1.09	tr|A0A075B5N9|A0A075B5N9_MOUSE Protein Igkv3-7 OS=Mus musculus GN=Igkv3-7 PE=4 SV=4
108	5	Uniprot_Mouse	P01659	114	12445	4	4	2	2	0.94	sp|P01659|KV3A7_MOUSE Ig kappa chain V-III region TEPC 124 OS=Mus musculus PE=1 SV=1
108	6	Uniprot_Mouse	A0A075B5N2	41	12782	3	3	2	2	0.91	tr|A0A075B5N2|A0A075B5N2_MOUSE Protein Igkv6-29 OS=Mus musculus GN=Igkv6-29 PE=4 SV=4
109	1	Uniprot_Mouse	Q8BP67	250	17882	8	8	4	4	1.54	sp|Q8BP67|RL24_MOUSE 60S ribosomal protein L24 OS=Mus musculus GN=Rpl24 PE=1 SV=2
110	1	Uniprot_Mouse	Q6ZWN5	248	22635	12	12	7	7	2.64	sp|Q6ZWN5|RS9_MOUSE 40S ribosomal protein S9 OS=Mus musculus GN=Rps9 PE=1 SV=3
111	1	Uniprot_Mouse	P62908	245	26828	10	10	6	6	1.55	sp|P62908|RS3_MOUSE 40S ribosomal protein S3 OS=Mus musculus GN=Rps3 PE=1 SV=1
112	1	Uniprot_Mouse	A0A0A6YX26	242	14987	5	5	2	2	0.74	tr|A0A0A6YX26|A0A0A6YX26_MOUSE 60S ribosomal protein L31 OS=Mus musculus GN=Rpl31 PE=1 SV=1
113	1	Uniprot_Mouse	P01636	234	12137	4	4	2	2	0.97	sp|P01636|KV5A4_MOUSE Ig kappa chain V-V region MOPC 149 OS=Mus musculus PE=1 SV=1
114	1	Uniprot_Mouse	P01638	232	13148	5	5	3	3	1.57	sp|P01638|KV5A6_MOUSE Ig kappa chain V-V region L6 (Fragment) OS=Mus musculus PE=4 SV=1
114	2	Uniprot_Mouse	A0A075B5K0	223	13317	3	3	2	2	0.86	tr|A0A075B5K0|A0A075B5K0_MOUSE Uncharacterized protein OS=Mus musculus GN=Igkv14-126 PE=4 SV=4
115	1	Uniprot_Mouse	Q9DAW9	231	36577	10	10	5	5	0.99	sp|Q9DAW9|CNN3_MOUSE Calponin-3 OS=Mus musculus GN=Cnn3 PE=1 SV=1
115	2	Uniprot_Mouse	Q08093	107	33590	6	6	6	6	1.12	sp|Q08093|CNN2_MOUSE Calponin-2 OS=Mus musculus GN=Cnn2 PE=1 SV=1
116	1	Uniprot_Mouse	A2AEX6	231	36995	10	10	6	6	0.98	tr|A2AEX6|A2AEX6_MOUSE Four and a half LIM domains protein 1 OS=Mus musculus GN=Fhl1 PE=1 SV=1
117	1	Uniprot_Mouse	E9PXW9	230	45108	7	7	5	5	0.6	tr|E9PXW9|E9PXW9_MOUSE Transcription factor GATA-4 OS=Mus musculus GN=Gata4 PE=1 SV=1
118	1	Uniprot_Mouse	D6RCW7	229	20325	6	6	3	3	0.85	tr|D6RCW7|D6RCW7_MOUSE F-actin-capping protein subunit alpha-2 OS=Mus musculus GN=Capza2 PE=1 SV=1
118	2	Uniprot_Mouse	P47753	224	33090	6	6	3	3	0.46	sp|P47753|CAZA1_MOUSE F-actin-capping protein subunit alpha-1 OS=Mus musculus GN=Capza1 PE=1 SV=4
119	1	Uniprot_Mouse	E9PYL9	227	20482	6	6	3	3	0.84	tr|E9PYL9|E9PYL9_MOUSE Uncharacterized protein OS=Mus musculus GN=Gm10036 PE=3 SV=1
120	1	Uniprot_Mouse	Q80X50	226	116842	14	14	10	10	0.44	sp|Q80X50|UBP2L_MOUSE Ubiquitin-associated protein 2-like OS=Mus musculus GN=Ubap2l PE=1 SV=1
121	1	Student_Contaminants	ENSEMBL:ENSBTAP00000007350	224	194525	4	4	2	2	0.04	ENSEMBL:ENSBTAP00000007350 (Bos taurus) similar to Complement C4-A precursor
122	1	Uniprot_Mouse	Q5MJ56	223	252048	14	14	13	13	0.24	tr|Q5MJ56|Q5MJ56_MOUSE Myosin VIIa isoform 2 OS=Mus musculus GN=Myo7a PE=1 SV=1
123	1	Uniprot_Mouse	P62830	222	14970	6	6	3	3	1.29	sp|P62830|RL23_MOUSE 60S ribosomal protein L23 OS=Mus musculus GN=Rpl23 PE=1 SV=1
124	1	Uniprot_Mouse	Q8BZN7	221	80234	15	15	8	8	0.52	tr|Q8BZN7|Q8BZN7_MOUSE Thyroid hormone receptor-associated protein 3 OS=Mus musculus GN=Thrap3 PE=1 SV=1
125	1	Uniprot_Mouse	P62889	220	12947	7	7	4	4	2.56	sp|P62889|RL30_MOUSE 60S ribosomal protein L30 OS=Mus musculus GN=Rpl30 PE=3 SV=2
126	1	Uniprot_Mouse	Q61136	219	117304	7	7	5	5	0.2	sp|Q61136|PRP4B_MOUSE Serine/threonine-protein kinase PRP4 homolog OS=Mus musculus GN=Prpf4b PE=1 SV=3
127	1	Uniprot_Mouse	F6YVP7	215	17661	8	8	6	6	3.11	tr|F6YVP7|F6YVP7_MOUSE Uncharacterized protein OS=Mus musculus GN=Gm10260 PE=3 SV=2
128	1	Uniprot_Mouse	Q8BL97	215	31027	8	8	5	5	0.96	sp|Q8BL97|SRSF7_MOUSE Serine/arginine-rich splicing factor 7 OS=Mus musculus GN=Srsf7 PE=1 SV=1
128	2	Uniprot_Mouse	P84104	198	19546	12	12	4	4	1.35	sp|P84104|SRSF3_MOUSE Serine/arginine-rich splicing factor 3 OS=Mus musculus GN=Srsf3 PE=1 SV=1
129	1	Uniprot_Mouse	A0A075B5S5	215	13615	6	6	3	3	2.35	tr|A0A075B5S5|A0A075B5S5_MOUSE Protein Ighv7-4 OS=Mus musculus GN=Ighv7-4 PE=4 SV=1
130	1	Uniprot_Mouse	P11499	214	83571	8	8	5	5	0.29	sp|P11499|HS90B_MOUSE Heat shock protein HSP 90-beta OS=Mus musculus GN=Hsp90ab1 PE=1 SV=3
131	1	Uniprot_Mouse	Q8BP92	213	37248	10	10	4	4	0.57	sp|Q8BP92|RCN2_MOUSE Reticulocalbin-2 OS=Mus musculus GN=Rcn2 PE=2 SV=1
132	1	Uniprot_Mouse	P60843	209	46353	8	8	6	6	0.72	sp|P60843|IF4A1_MOUSE Eukaryotic initiation factor 4A-I OS=Mus musculus GN=Eif4a1 PE=1 SV=1
132	2	Uniprot_Mouse	Q91VC3	140	47095	9	9	7	7	0.87	sp|Q91VC3|IF4A3_MOUSE Eukaryotic initiation factor 4A-III OS=Mus musculus GN=Eif4a3 PE=2 SV=3
133	1	Uniprot_Mouse	P14131	208	16549	7	7	5	5	2.51	sp|P14131|RS16_MOUSE 40S ribosomal protein S16 OS=Mus musculus GN=Rps16 PE=2 SV=4
134	1	Uniprot_Mouse	D3YYE1	204	23111	3	3	2	2	0.44	tr|D3YYE1|D3YYE1_MOUSE Acidic leucine-rich nuclear phosphoprotein 32 family member A (Fragment) OS=Mus musculus GN=Anp32a PE=1 SV=1
135	1	Uniprot_Mouse	D3Z3F1	204	65916	12	12	8	8	0.67	tr|D3Z3F1|D3Z3F1_MOUSE Pre-mRNA 3'-end-processing factor FIP1 OS=Mus musculus GN=Fip1l1 PE=1 SV=1
136	1	Uniprot_Mouse	Q9D1M0	202	36056	7	7	4	4	0.59	sp|Q9D1M0|SEC13_MOUSE Protein SEC13 homolog OS=Mus musculus GN=Sec13 PE=2 SV=3
137	1	Uniprot_Mouse	P14869	191	34366	9	9	5	5	0.84	sp|P14869|RLA0_MOUSE 60S acidic ribosomal protein P0 OS=Mus musculus GN=Rplp0 PE=1 SV=3
138	1	Student_Contaminants	P04258	189	139608	4	4	1	1	0.03	P04258 SWISS-PROT:P04258 (Bos taurus) Similar to Collagen alpha 1(III) chain
139	1	Uniprot_Mouse	P62715	188	36123	5	5	3	3	0.42	sp|P62715|PP2AB_MOUSE Serine/threonine-protein phosphatase 2A catalytic subunit beta isoform OS=Mus musculus GN=Ppp2cb PE=1 SV=1
140	1	Uniprot_Mouse	Q6ZWV3	187	25044	9	9	4	4	0.95	sp|Q6ZWV3|RL10_MOUSE 60S ribosomal protein L10 OS=Mus musculus GN=Rpl10 PE=1 SV=3
141	1	Uniprot_Mouse	D3YU80	185	11775	6	6	2	2	1.01	tr|D3YU80|D3YU80_MOUSE Cold-inducible RNA-binding protein (Fragment) OS=Mus musculus GN=Cirbp PE=1 SV=1
142	1	Uniprot_Mouse	Q62241	184	17522	5	5	2	2	0.61	sp|Q62241|RU1C_MOUSE U1 small nuclear ribonucleoprotein C OS=Mus musculus GN=Snrpc PE=2 SV=1
143	1	Uniprot_Mouse	E9QAZ2	183	24176	10	10	6	6	1.82	tr|E9QAZ2|E9QAZ2_MOUSE Ribosomal protein L15 OS=Mus musculus GN=Gm10020 PE=3 SV=1
144	1	Uniprot_Mouse	Q9WUM4	182	53771	7	7	5	5	0.48	sp|Q9WUM4|COR1C_MOUSE Coronin-1C OS=Mus musculus GN=Coro1c PE=1 SV=2
145	1	Uniprot_Mouse	Q8VIJ6	180	75508	7	7	5	5	0.32	sp|Q8VIJ6|SFPQ_MOUSE Splicing factor, proline- and glutamine-rich OS=Mus musculus GN=Sfpq PE=1 SV=1
146	1	Uniprot_Mouse	Q9JJI8	177	8256	9	9	6	6	18.28	sp|Q9JJI8|RL38_MOUSE 60S ribosomal protein L38 OS=Mus musculus GN=Rpl38 PE=3 SV=3
147	1	Uniprot_Mouse	P63276	176	15571	9	9	5	5	2.79	sp|P63276|RS17_MOUSE 40S ribosomal protein S17 OS=Mus musculus GN=Rps17 PE=1 SV=2
148	1	Uniprot_Mouse	Q6ZWZ4	176	12303	6	6	3	3	1.72	tr|Q6ZWZ4|Q6ZWZ4_MOUSE 60S ribosomal protein L36 OS=Mus musculus GN=Rpl36 PE=1 SV=1
149	1	Uniprot_Mouse	A0A075B5K2	175	10624	5	5	3	3	2.17	tr|A0A075B5K2|A0A075B5K2_MOUSE Protein Igkv9-124 OS=Mus musculus GN=Igkv9-124 PE=4 SV=4
150	1	Uniprot_Mouse	A0A075B5M7	175	10550	6	6	3	3	2.2	tr|A0A075B5M7|A0A075B5M7_MOUSE Protein Igkv5-39 OS=Mus musculus GN=Igkv5-39 PE=4 SV=4
150	2	Uniprot_Mouse	A0A0B4J1J2	98	12706	4	4	2	2	0.92	tr|A0A0B4J1J2|A0A0B4J1J2_MOUSE Protein Igkv5-43 OS=Mus musculus GN=Igkv5-43 PE=1 SV=1
151	1	Uniprot_Mouse	Q8BX10	175	32146	12	12	9	9	2.23	sp|Q8BX10|PGAM5_MOUSE Serine/threonine-protein phosphatase PGAM5, mitochondrial OS=Mus musculus GN=Pgam5 PE=2 SV=1
151	2	Uniprot_Mouse	F6YJC6	33	13324	2	2	2	2	0.86	tr|F6YJC6|F6YJC6_MOUSE Serine/threonine-protein phosphatase PGAM5, mitochondrial (Fragment) OS=Mus musculus GN=Pgam5 PE=1 SV=1
152	1	Uniprot_Mouse	D3YYM6	174	20572	5	5	5	5	1.76	tr|D3YYM6|D3YYM6_MOUSE 40S ribosomal protein S5 (Fragment) OS=Mus musculus GN=Rps5 PE=1 SV=1
153	1	Uniprot_Mouse	A0A075B663	174	12418	5	5	2	2	0.94	tr|A0A075B663|A0A075B663_MOUSE Protein Iglv1 OS=Mus musculus GN=Iglv1 PE=4 SV=1
154	1	Uniprot_Mouse	Q921S7	172	48710	8	8	7	7	0.83	sp|Q921S7|RM37_MOUSE 39S ribosomal protein L37, mitochondrial OS=Mus musculus GN=Mrpl37 PE=2 SV=1
155	1	Uniprot_Mouse	F6RJ39	171	143965	6	6	5	5	0.16	tr|F6RJ39|F6RJ39_MOUSE Apoptotic chromatin condensation inducer in the nucleus (Fragment) OS=Mus musculus GN=Acin1 PE=1 SV=1
156	1	Uniprot_Mouse	P67984	170	14807	4	4	3	3	1.32	sp|P67984|RL22_MOUSE 60S ribosomal protein L22 OS=Mus musculus GN=Rpl22 PE=1 SV=2
157	1	Uniprot_Mouse	P68040	167	35511	10	10	7	7	1.29	sp|P68040|GBLP_MOUSE Guanine nucleotide-binding protein subunit beta-2-like 1 OS=Mus musculus GN=Gnb2l1 PE=1 SV=3
158	1	Uniprot_Mouse	B1AXW5	167	19086	8	8	6	6	2.7	tr|B1AXW5|B1AXW5_MOUSE Peroxiredoxin-1 (Fragment) OS=Mus musculus GN=Prdx1 PE=1 SV=5
158	2	Uniprot_Mouse	B1AZS9	101	26545	4	4	3	3	0.61	tr|B1AZS9|B1AZS9_MOUSE Peroxiredoxin-4 (Fragment) OS=Mus musculus GN=Prdx4 PE=1 SV=1
158	3	Uniprot_Mouse	D3YYB2	17	25110	1	1	1	1	0.18	tr|D3YYB2|D3YYB2_MOUSE THUMP domain-containing protein 3 (Fragment) OS=Mus musculus GN=Thumpd3 PE=1 SV=5
159	1	Student_Contaminants	COL1A1	165	140672	5	5	2	2	0.06	COL1A1 collagen type I alpha 1 chain [ Bos mutus (wild yak) ]
159	2	Uniprot_Mouse	P11087	103	138974	3	3	2	2	0.06	sp|P11087|CO1A1_MOUSE Collagen alpha-1(I) chain OS=Mus musculus GN=Col1a1 PE=1 SV=4
160	1	Uniprot_Mouse	P18528	165	11114	3	3	1	1	0.45	sp|P18528|HVM57_MOUSE Ig heavy chain V region 6.96 OS=Mus musculus PE=4 SV=1
161	1	Uniprot_Mouse	Q3U7K7	157	54320	8	8	6	6	0.59	tr|Q3U7K7|Q3U7K7_MOUSE E3 ubiquitin-protein ligase TRIM21 OS=Mus musculus GN=Trim21 PE=1 SV=1
162	1	Uniprot_Mouse	Q9Z1X4	152	96360	6	6	4	4	0.19	sp|Q9Z1X4|ILF3_MOUSE Interleukin enhancer-binding factor 3 OS=Mus musculus GN=Ilf3 PE=1 SV=2
163	1	Uniprot_Mouse	E9PUX4	151	33627	7	7	5	5	0.87	tr|E9PUX4|E9PUX4_MOUSE 60S ribosomal protein L6 OS=Mus musculus GN=Gm5428 PE=3 SV=1
164	1	Uniprot_Mouse	A0A075B5L2	150	12377	4	4	1	1	0.39	tr|A0A075B5L2|A0A075B5L2_MOUSE Protein Igkv4-91 OS=Mus musculus GN=Igkv4-91 PE=4 SV=1
165	1	Uniprot_Mouse	A0A075B5R7	150	13164	3	3	2	2	0.87	tr|A0A075B5R7|A0A075B5R7_MOUSE Protein Ighv14-2 (Fragment) OS=Mus musculus GN=Ighv14-2 PE=4 SV=1
166	1	Uniprot_Mouse	P27048	148	23811	4	4	3	3	0.69	sp|P27048|RSMB_MOUSE Small nuclear ribonucleoprotein-associated protein B OS=Mus musculus GN=Snrpb PE=1 SV=1
167	1	Uniprot_Mouse	Q9EST5	148	31231	6	6	5	5	0.96	sp|Q9EST5|AN32B_MOUSE Acidic leucine-rich nuclear phosphoprotein 32 family member B OS=Mus musculus GN=Anp32b PE=1 SV=1
168	1	Uniprot_Mouse	P17182	147	47453	6	6	5	5	0.56	sp|P17182|ENOA_MOUSE Alpha-enolase OS=Mus musculus GN=Eno1 PE=1 SV=3
169	1	Uniprot_Mouse	D3YYV8	145	18214	7	7	6	6	2.94	tr|D3YYV8|D3YYV8_MOUSE 60S ribosomal protein L5 (Fragment) OS=Mus musculus GN=Rpl5 PE=1 SV=1
170	1	Uniprot_Mouse	Q3TJD7	145	51170	6	6	3	3	0.28	sp|Q3TJD7|PDLI7_MOUSE PDZ and LIM domain protein 7 OS=Mus musculus GN=Pdlim7 PE=2 SV=1
171	1	Uniprot_Mouse	Q9CXY6	141	43263	9	9	7	7	0.98	sp|Q9CXY6|ILF2_MOUSE Interleukin enhancer-binding factor 2 OS=Mus musculus GN=Ilf2 PE=1 SV=1
172	1	Uniprot_Mouse	A2AMW0	140	29562	6	6	6	6	1.34	tr|A2AMW0|A2AMW0_MOUSE Capping protein (Actin filament) muscle Z-line, beta, isoform CRA_a OS=Mus musculus GN=Capzb PE=1 SV=1
173	1	Uniprot_Mouse	P62806	140	11360	5	5	4	4	3.26	sp|P62806|H4_MOUSE Histone H4 OS=Mus musculus GN=Hist1h4a PE=1 SV=2
174	1	Uniprot_Mouse	D3YVF4	140	12874	5	5	3	3	1.61	tr|D3YVF4|D3YVF4_MOUSE 40S ribosomal protein S14 (Fragment) OS=Mus musculus GN=Rps14 PE=1 SV=1
175	1	Uniprot_Mouse	Q99LX5	138	29509	5	5	4	4	0.76	sp|Q99LX5|MMTA2_MOUSE Multiple myeloma tumor-associated protein 2 homolog OS=Mus musculus GN=Mmtag2 PE=2 SV=1
176	1	Uniprot_Mouse	B2RUM3	137	30853	7	7	3	3	0.5	tr|B2RUM3|B2RUM3_MOUSE AU015836 protein OS=Mus musculus GN=AU015836 PE=1 SV=1
177	1	Uniprot_Mouse	Q5SUS9	137	69279	10	10	5	5	0.36	tr|Q5SUS9|Q5SUS9_MOUSE RNA-binding protein EWS OS=Mus musculus GN=Ewsr1 PE=1 SV=1
178	1	Uniprot_Mouse	G3UXT7	136	14228	5	5	3	3	1.39	tr|G3UXT7|G3UXT7_MOUSE RNA-binding protein FUS (Fragment) OS=Mus musculus GN=Fus PE=1 SV=1
179	1	Uniprot_Mouse	A0A0B4J1I5	135	12731	5	5	2	2	0.91	tr|A0A0B4J1I5|A0A0B4J1I5_MOUSE Protein Igkv4-70 OS=Mus musculus GN=Igkv4-70 PE=4 SV=1
179	2	Uniprot_Mouse	P01675	109	11734	4	4	3	3	1.85	sp|P01675|KV6A1_MOUSE Ig kappa chain V-VI region XRPC 44 OS=Mus musculus PE=1 SV=1
180	1	Uniprot_Mouse	A0A075B680	135	11332	4	4	2	2	1.06	tr|A0A075B680|A0A075B680_MOUSE Protein Ighv1-62-2 OS=Mus musculus GN=Ighv1-62-2 PE=4 SV=1
180	2	Uniprot_Mouse	A0A075B5V8	69	11190	4	4	2	2	1.08	tr|A0A075B5V8|A0A075B5V8_MOUSE Protein Ighv1-47 OS=Mus musculus GN=Ighv1-47 PE=4 SV=1
181	1	Uniprot_Mouse	Q7TNC4	134	46954	8	8	5	5	0.57	sp|Q7TNC4|LC7L2_MOUSE Putative RNA-binding protein Luc7-like 2 OS=Mus musculus GN=Luc7l2 PE=1 SV=1
181	2	Uniprot_Mouse	Q9CYI4	65	44307	4	4	3	3	0.33	sp|Q9CYI4|LUC7L_MOUSE Putative RNA-binding protein Luc7-like 1 OS=Mus musculus GN=Luc7l PE=2 SV=2
182	1	Uniprot_Mouse	Q8K310	134	95085	7	7	5	5	0.25	sp|Q8K310|MATR3_MOUSE Matrin-3 OS=Mus musculus GN=Matr3 PE=1 SV=1
183	1	Uniprot_Mouse	A0A075B5K6	133	13260	2	2	1	1	0.37	tr|A0A075B5K6|A0A075B5K6_MOUSE Protein Igkv2-109 OS=Mus musculus GN=Igkv2-109 PE=4 SV=1
184	1	Uniprot_Mouse	P62267	133	15969	5	5	3	3	1.18	sp|P62267|RS23_MOUSE 40S ribosomal protein S23 OS=Mus musculus GN=Rps23 PE=1 SV=3
185	1	Uniprot_Mouse	Q8BGJ5	132	57027	6	6	5	5	0.45	tr|Q8BGJ5|Q8BGJ5_MOUSE MCG13402, isoform CRA_a OS=Mus musculus GN=Ptbp1 PE=1 SV=1
186	1	Uniprot_Mouse	Q8BGZ2	132	26225	7	7	3	3	0.62	sp|Q8BGZ2|F168A_MOUSE Protein FAM168A OS=Mus musculus GN=Fam168a PE=2 SV=1
187	1	Uniprot_Mouse	P62751	131	17684	2	2	2	2	0.6	sp|P62751|RL23A_MOUSE 60S ribosomal protein L23a OS=Mus musculus GN=Rpl23a PE=1 SV=1
188	1	Uniprot_Mouse	Q9EQC5	130	89731	10	10	7	7	0.39	sp|Q9EQC5|NTKL_MOUSE N-terminal kinase-like protein OS=Mus musculus GN=Scyl1 PE=1 SV=1
189	1	Uniprot_Mouse	E9Q5A0	127	48996	7	7	4	4	0.41	tr|E9Q5A0|E9Q5A0_MOUSE 60S ribosomal protein L13a OS=Mus musculus GN=Rpl13a PE=1 SV=1
190	1	Uniprot_Mouse	Q9CQE8	126	28249	5	5	4	4	0.81	sp|Q9CQE8|CN166_MOUSE UPF0568 protein C14orf166 homolog OS=Mus musculus PE=2 SV=1
191	1	Uniprot_Mouse	P62855	125	13292	2	2	1	1	0.36	sp|P62855|RS26_MOUSE 40S ribosomal protein S26 OS=Mus musculus GN=Rps26 PE=3 SV=3
192	1	Uniprot_Mouse	Q3KQM4	123	34222	7	7	5	5	0.85	tr|Q3KQM4|Q3KQM4_MOUSE Splicing factor U2AF 65 kDa subunit OS=Mus musculus GN=U2af2 PE=1 SV=1
193	1	Uniprot_Mouse	P62849	123	15413	3	3	2	2	0.71	sp|P62849|RS24_MOUSE 40S ribosomal protein S24 OS=Mus musculus GN=Rps24 PE=2 SV=1
194	1	Uniprot_Mouse	P18531	122	13201	5	5	2	2	0.87	sp|P18531|HVM60_MOUSE Ig heavy chain V region 3-6 OS=Mus musculus GN=Ighv3-6 PE=1 SV=1
195	1	Uniprot_Mouse	Q921L6	122	57222	8	8	6	6	0.56	tr|Q921L6|Q921L6_MOUSE Cortactin, isoform CRA_a OS=Mus musculus GN=Cttn PE=1 SV=1
196	1	Uniprot_Mouse	Q6P6L6	121	121698	6	6	4	4	0.15	tr|Q6P6L6|Q6P6L6_MOUSE Gem (Nuclear organelle) associated protein 4 OS=Mus musculus GN=Gemin4 PE=1 SV=1
197	1	Uniprot_Mouse	Q9CPN9	120	27089	4	4	1	1	0.17	tr|Q9CPN9|Q9CPN9_MOUSE Protein 2210010C04Rik OS=Mus musculus GN=2210010C04Rik PE=1 SV=1
198	1	Uniprot_Mouse	A0A087WR50	119	266327	6	6	5	5	0.08	tr|A0A087WR50|A0A087WR50_MOUSE Fibronectin OS=Mus musculus GN=Fn1 PE=1 SV=1
199	1	Uniprot_Mouse	Q99KG3	118	103773	4	4	3	3	0.13	sp|Q99KG3|RBM10_MOUSE RNA-binding protein 10 OS=Mus musculus GN=Rbm10 PE=1 SV=1
200	1	Uniprot_Mouse	Q9DBF7	117	48839	8	8	4	4	0.41	sp|Q9DBF7|CWC25_MOUSE Pre-mRNA-splicing factor CWC25 homolog OS=Mus musculus GN=Cwc25 PE=2 SV=2
201	1	Uniprot_Mouse	Q9JHJ0	117	39592	8	8	5	5	0.7	sp|Q9JHJ0|TMOD3_MOUSE Tropomodulin-3 OS=Mus musculus GN=Tmod3 PE=2 SV=1
202	1	Uniprot_Mouse	A0A0B4J1J7	117	10757	4	4	3	3	2.13	tr|A0A0B4J1J7|A0A0B4J1J7_MOUSE Protein Ighv1-82 OS=Mus musculus GN=Ighv1-82 PE=4 SV=1
203	1	Uniprot_Mouse	E9PZ21	115	45277	3	3	2	2	0.2	tr|E9PZ21|E9PZ21_MOUSE RNA-binding motif, single-stranded-interacting protein 1 OS=Mus musculus GN=Rbms1 PE=1 SV=1
204	1	Uniprot_Mouse	P61514	115	10497	5	5	2	2	1.17	sp|P61514|RL37A_MOUSE 60S ribosomal protein L37a OS=Mus musculus GN=Rpl37a PE=3 SV=2
205	1	Uniprot_Mouse	O35286	114	91748	10	10	8	8	0.45	sp|O35286|DHX15_MOUSE Pre-mRNA-splicing factor ATP-dependent RNA helicase DHX15 OS=Mus musculus GN=Dhx15 PE=1 SV=2
206	1	Uniprot_Mouse	P01843	113	11739	4	4	3	3	1.85	sp|P01843|LAC1_MOUSE Ig lambda-1 chain C region OS=Mus musculus PE=1 SV=1
207	1	Uniprot_Mouse	A0A075B5V5	112	13036	3	3	1	1	0.37	tr|A0A075B5V5|A0A075B5V5_MOUSE Protein Ighv1-39 (Fragment) OS=Mus musculus GN=Ighv1-39 PE=4 SV=1
208	1	Uniprot_Mouse	Q9DAE2	111	42115	6	6	4	4	0.49	tr|Q9DAE2|Q9DAE2_MOUSE Protein Rbmxl2 OS=Mus musculus GN=Rbmxl2 PE=1 SV=1
209	1	Uniprot_Mouse	A0A075B5N4	110	11083	5	5	3	3	2.03	tr|A0A075B5N4|A0A075B5N4_MOUSE Protein Igkv8-27 OS=Mus musculus GN=Igkv8-27 PE=1 SV=1
210	1	Uniprot_Mouse	A2A6H0	110	21332	2	2	2	2	0.48	tr|A2A6H0|A2A6H0_MOUSE LIM and SH3 domain protein 1 (Fragment) OS=Mus musculus GN=Lasp1 PE=1 SV=1
211	1	Uniprot_Mouse	P14206	109	32931	4	4	3	3	0.47	sp|P14206|RSSA_MOUSE 40S ribosomal protein SA OS=Mus musculus GN=Rpsa PE=1 SV=4
212	1	Uniprot_Mouse	Q4FK66	109	37642	4	4	4	4	0.56	sp|Q4FK66|PR38A_MOUSE Pre-mRNA-splicing factor 38A OS=Mus musculus GN=Prpf38a PE=1 SV=1
213	1	Uniprot_Mouse	P62317	108	13632	5	5	2	2	0.83	sp|P62317|SMD2_MOUSE Small nuclear ribonucleoprotein Sm D2 OS=Mus musculus GN=Snrpd2 PE=3 SV=1
214	1	Uniprot_Mouse	Q9CYA6	107	78604	6	6	6	6	0.38	sp|Q9CYA6|ZCHC8_MOUSE Zinc finger CCHC domain-containing protein 8 OS=Mus musculus GN=Zcchc8 PE=2 SV=3
215	1	Uniprot_Mouse	Q91VB8	106	15160	8	8	4	4	1.97	tr|Q91VB8|Q91VB8_MOUSE Alpha globin 1 OS=Mus musculus GN=haemaglobin alpha 2 PE=1 SV=1
216	1	Uniprot_Mouse	A0A075B5R2	106	13620	3	3	2	2	0.83	tr|A0A075B5R2|A0A075B5R2_MOUSE Uncharacterized protein (Fragment) OS=Mus musculus GN=Ighv7-3 PE=4 SV=2
217	1	Uniprot_Mouse	Q8CH18	106	132663	4	4	4	4	0.14	sp|Q8CH18|CCAR1_MOUSE Cell division cycle and apoptosis regulator protein 1 OS=Mus musculus GN=Ccar1 PE=1 SV=1
218	1	Uniprot_Mouse	Q91VH2	105	66903	5	5	3	3	0.21	sp|Q91VH2|SNX9_MOUSE Sorting nexin-9 OS=Mus musculus GN=Snx9 PE=1 SV=1
219	1	Uniprot_Mouse	Q62261	104	274908	6	6	5	5	0.08	sp|Q62261|SPTB2_MOUSE Spectrin beta chain, non-erythrocytic 1 OS=Mus musculus GN=Sptbn1 PE=1 SV=2
220	1	Uniprot_Mouse	Q62425	103	9321	5	5	2	2	1.4	sp|Q62425|NDUA4_MOUSE Cytochrome c oxidase subunit NDUFA4 OS=Mus musculus GN=Ndufa4 PE=1 SV=2
221	1	Uniprot_Mouse	O88207	101	184248	3	3	2	2	0.05	sp|O88207|CO5A1_MOUSE Collagen alpha-1(V) chain OS=Mus musculus GN=Col5a1 PE=2 SV=2
222	1	Uniprot_Mouse	Q5SYD0	100	116806	6	6	6	6	0.24	sp|Q5SYD0|MYO1D_MOUSE Unconventional myosin-Id OS=Mus musculus GN=Myo1d PE=1 SV=1
223	1	Uniprot_Mouse	P62245	99	14944	6	6	3	3	2.02	sp|P62245|RS15A_MOUSE 40S ribosomal protein S15a OS=Mus musculus GN=Rps15a PE=1 SV=2
224	1	Uniprot_Mouse	Q6PFR5	98	32354	4	4	4	4	0.68	sp|Q6PFR5|TRA2A_MOUSE Transformer-2 protein homolog alpha OS=Mus musculus GN=Tra2a PE=1 SV=1
225	1	Uniprot_Mouse	A0A075B5N3	98	11107	5	5	3	3	2.03	tr|A0A075B5N3|A0A075B5N3_MOUSE Protein Igkv8-28 OS=Mus musculus GN=Igkv8-28 PE=1 SV=4
226	1	Uniprot_Mouse	Q6ZWU9	97	9797	3	3	1	1	0.52	sp|Q6ZWU9|RS27_MOUSE 40S ribosomal protein S27 OS=Mus musculus GN=Rps27 PE=1 SV=3
227	1	Uniprot_Mouse	P60335	97	37987	5	5	3	3	0.39	sp|P60335|PCBP1_MOUSE Poly(rC)-binding protein 1 OS=Mus musculus GN=Pcbp1 PE=1 SV=1
228	1	Uniprot_Mouse	D3YZA1	97	13540	3	3	2	2	1.5	tr|D3YZA1|D3YZA1_MOUSE Chromatin target of PRMT1 protein (Fragment) OS=Mus musculus GN=Chtop PE=1 SV=5
229	1	Uniprot_Mouse	Q9QZ59	95	39875	4	4	3	3	0.37	sp|Q9QZ59|DMRT1_MOUSE Doublesex- and mab-3-related transcription factor 1 OS=Mus musculus GN=Dmrt1 PE=1 SV=2
230	1	Uniprot_Mouse	F7AYW2	94	159165	3	3	3	3	0.08	tr|F7AYW2|F7AYW2_MOUSE Protein PRRC2B (Fragment) OS=Mus musculus GN=Prrc2b PE=1 SV=1
231	1	Uniprot_Mouse	A2A8V8	93	102656	4	4	3	3	0.13	tr|A2A8V8|A2A8V8_MOUSE Serine/arginine repetitive matrix protein 1 OS=Mus musculus GN=Srrm1 PE=1 SV=1
232	1	Uniprot_Mouse	A2ATP5	92	59734	4	4	4	4	0.33	tr|A2ATP5|A2ATP5_MOUSE Myelin expression factor 2 OS=Mus musculus GN=Myef2 PE=1 SV=1
233	1	Uniprot_Mouse	A0A075B5R1	92	13068	2	2	2	2	0.88	tr|A0A075B5R1|A0A075B5R1_MOUSE Protein Ighv5-17 (Fragment) OS=Mus musculus GN=Ighv5-17 PE=4 SV=1
234	1	Uniprot_Mouse	Q02105	92	26374	5	5	2	2	0.37	sp|Q02105|C1QC_MOUSE Complement C1q subcomponent subunit C OS=Mus musculus GN=C1qc PE=2 SV=2
235	1	Uniprot_Mouse	Q9Z315	91	91001	4	4	4	4	0.2	sp|Q9Z315|SNUT1_MOUSE U4/U6.U5 tri-snRNP-associated protein 1 OS=Mus musculus GN=Sart1 PE=2 SV=1
236	1	Uniprot_Mouse	Q6PE01	91	39707	2	2	2	2	0.24	sp|Q6PE01|SNR40_MOUSE U5 small nuclear ribonucleoprotein 40 kDa protein OS=Mus musculus GN=Snrnp40 PE=2 SV=1
237	1	Uniprot_Mouse	E9QNY3	90	17025	2	2	1	1	0.28	tr|E9QNY3|E9QNY3_MOUSE Myosin regulatory light chain 10 OS=Mus musculus GN=Myl10 PE=1 SV=1
238	1	Uniprot_Mouse	E9PZF5	90	19337	3	3	3	3	0.91	tr|E9PZF5|E9PZF5_MOUSE Acidic leucine-rich nuclear phosphoprotein 32 family member E (Fragment) OS=Mus musculus GN=Anp32e PE=1 SV=1
239	1	Uniprot_Mouse	A0A0A6YXQ0	90	13291	3	3	2	2	0.86	tr|A0A0A6YXQ0|A0A0A6YXQ0_MOUSE Protein Ighv8-8 (Fragment) OS=Mus musculus GN=Ighv8-8 PE=4 SV=1
240	1	Uniprot_Mouse	Q9EPJ9	90	45546	4	4	2	2	0.2	sp|Q9EPJ9|ARFG1_MOUSE ADP-ribosylation factor GTPase-activating protein 1 OS=Mus musculus GN=Arfgap1 PE=1 SV=2
241	1	Uniprot_Mouse	A0A087WPL5	89	150836	10	10	8	8	0.25	tr|A0A087WPL5|A0A087WPL5_MOUSE ATP-dependent RNA helicase A OS=Mus musculus GN=Dhx9 PE=1 SV=1
242	1	Uniprot_Mouse	P52480	89	58378	4	4	3	3	0.24	sp|P52480|KPYM_MOUSE Pyruvate kinase PKM OS=Mus musculus GN=Pkm PE=1 SV=4
243	1	Uniprot_Mouse	Q8BP71	89	47301	3	3	2	2	0.2	sp|Q8BP71|RFOX2_MOUSE RNA binding protein fox-1 homolog 2 OS=Mus musculus GN=Rbfox2 PE=1 SV=2
244	1	Uniprot_Mouse	O70433	88	34046	6	6	5	5	0.85	sp|O70433|FHL2_MOUSE Four and a half LIM domains protein 2 OS=Mus musculus GN=Fhl2 PE=1 SV=1
245	1	Uniprot_Mouse	Q925I1	88	66872	5	5	4	4	0.29	sp|Q925I1|ATAD3_MOUSE ATPase family AAA domain-containing protein 3 OS=Mus musculus GN=Atad3 PE=1 SV=1
246	1	Uniprot_Mouse	Q9ERG0	88	84635	4	4	4	4	0.22	sp|Q9ERG0|LIMA1_MOUSE LIM domain and actin-binding protein 1 OS=Mus musculus GN=Lima1 PE=1 SV=3
247	1	Uniprot_Mouse	A0A087WPR6	88	4461	1	1	1	1	1.41	tr|A0A087WPR6|A0A087WPR6_MOUSE Actin-related protein 3 OS=Mus musculus GN=Actr3 PE=1 SV=1
248	1	Uniprot_Mouse	Q99LC3	87	40863	2	2	2	2	0.23	sp|Q99LC3|NDUAA_MOUSE NADH dehydrogenase [ubiquinone] 1 alpha subcomplex subunit 10, mitochondrial OS=Mus musculus GN=Ndufa10 PE=1 SV=1
249	1	Uniprot_Mouse	Q9DBR0	87	76817	4	4	4	4	0.25	sp|Q9DBR0|AKAP8_MOUSE A-kinase anchor protein 8 OS=Mus musculus GN=Akap8 PE=1 SV=1
250	1	Uniprot_Mouse	Q9DB77	86	48262	3	3	2	2	0.19	sp|Q9DB77|QCR2_MOUSE Cytochrome b-c1 complex subunit 2, mitochondrial OS=Mus musculus GN=Uqcrc2 PE=1 SV=1
251	1	Uniprot_Mouse	Q9CQF3	86	26281	7	7	5	5	1.22	sp|Q9CQF3|CPSF5_MOUSE Cleavage and polyadenylation specificity factor subunit 5 OS=Mus musculus GN=Nudt21 PE=1 SV=1
252	1	Uniprot_Mouse	A0A075B5W1	85	13040	1	1	1	1	0.37	tr|A0A075B5W1|A0A075B5W1_MOUSE Protein Ighv1-50 (Fragment) OS=Mus musculus GN=Ighv1-50 PE=4 SV=1
253	1	Uniprot_Mouse	Q5SUF2	84	51818	2	2	2	2	0.18	sp|Q5SUF2|LC7L3_MOUSE Luc7-like protein 3 OS=Mus musculus GN=Luc7l3 PE=1 SV=1
254	1	Uniprot_Mouse	Q6A068	84	92361	4	4	4	4	0.2	sp|Q6A068|CDC5L_MOUSE Cell division cycle 5-like protein OS=Mus musculus GN=Cdc5l PE=1 SV=2
255	1	Uniprot_Mouse	D3YY73	84	10377	2	2	2	2	1.21	tr|D3YY73|D3YY73_MOUSE Histone deacetylase complex subunit SAP18 OS=Mus musculus GN=Sap18 PE=1 SV=1
256	1	Uniprot_Mouse	P62274	84	6900	3	3	2	2	2.21	sp|P62274|RS29_MOUSE 40S ribosomal protein S29 OS=Mus musculus GN=Rps29 PE=3 SV=2
257	1	Uniprot_Mouse	P61750	84	20498	6	6	3	3	0.84	sp|P61750|ARF4_MOUSE ADP-ribosylation factor 4 OS=Mus musculus GN=Arf4 PE=1 SV=2
257	2	Uniprot_Mouse	P84084	78	20631	5	5	3	3	0.83	sp|P84084|ARF5_MOUSE ADP-ribosylation factor 5 OS=Mus musculus GN=Arf5 PE=1 SV=2
258	1	Uniprot_Mouse	Q9D1I6	83	15978	2	2	2	2	0.68	sp|Q9D1I6|RM14_MOUSE 39S ribosomal protein L14, mitochondrial OS=Mus musculus GN=Mrpl14 PE=2 SV=1
259	1	Uniprot_Mouse	F8WGL3	82	25074	3	3	3	3	0.65	tr|F8WGL3|F8WGL3_MOUSE Cofilin-1 OS=Mus musculus GN=Cfl1 PE=1 SV=1
260	1	Uniprot_Mouse	Q9D554	82	59147	3	3	3	3	0.24	sp|Q9D554|SF3A3_MOUSE Splicing factor 3A subunit 3 OS=Mus musculus GN=Sf3a3 PE=2 SV=2
261	1	Uniprot_Mouse	O54962	82	10324	3	3	2	2	1.21	sp|O54962|BAF_MOUSE Barrier-to-autointegration factor OS=Mus musculus GN=Banf1 PE=1 SV=1
262	1	Uniprot_Mouse	A3KGU5	81	283519	7	7	7	7	0.11	tr|A3KGU5|A3KGU5_MOUSE Spectrin alpha chain, non-erythrocytic 1 OS=Mus musculus GN=Sptan1 PE=1 SV=1
263	1	Uniprot_Mouse	Q9R0Q7	80	18995	3	3	2	2	0.55	sp|Q9R0Q7|TEBP_MOUSE Prostaglandin E synthase 3 OS=Mus musculus GN=Ptges3 PE=1 SV=1
264	1	Uniprot_Mouse	Q00623	79	30597	2	2	2	2	0.32	sp|Q00623|APOA1_MOUSE Apolipoprotein A-I OS=Mus musculus GN=Apoa1 PE=1 SV=2
264	2	Student_Contaminants	P15497	70	30258	2	2	2	2	0.32	P15497 SWISS-PROT:P15497 (Bos taurus) Apolipoprotein A-I precursor
265	1	Uniprot_Mouse	H3BJE0	79	28946	7	7	3	3	0.54	tr|H3BJE0|H3BJE0_MOUSE Granulins (Fragment) OS=Mus musculus GN=Grn PE=1 SV=1
266	1	Uniprot_Mouse	Q9WVH9	79	52440	3	3	3	3	0.27	sp|Q9WVH9|FBLN5_MOUSE Fibulin-5 OS=Mus musculus GN=Fbln5 PE=1 SV=1
267	1	Uniprot_Mouse	Q9D0T1	79	14393	2	2	2	2	0.77	sp|Q9D0T1|NH2L1_MOUSE NHP2-like protein 1 OS=Mus musculus GN=Nhp2l1 PE=1 SV=4
268	1	Uniprot_Mouse	P63325	79	18904	3	3	3	3	0.94	sp|P63325|RS10_MOUSE 40S ribosomal protein S10 OS=Mus musculus GN=Rps10 PE=1 SV=1
269	1	Uniprot_Mouse	Q9WTX2	77	34806	3	3	3	3	0.44	sp|Q9WTX2|PRKRA_MOUSE Interferon-inducible double-stranded RNA-dependent protein kinase activator A OS=Mus musculus GN=Prkra PE=1 SV=1
270	1	Uniprot_Mouse	A0A075B5Q4	77	13238	3	3	2	2	0.87	tr|A0A075B5Q4|A0A075B5Q4_MOUSE Protein Ighv5-12 (Fragment) OS=Mus musculus GN=Ighv5-12 PE=4 SV=1
271	1	Uniprot_Mouse	A2AU61	76	23163	3	3	2	2	0.43	tr|A2AU61|A2AU61_MOUSE RNA-binding protein Raly (Fragment) OS=Mus musculus GN=Raly PE=1 SV=1
272	1	Uniprot_Mouse	Q8BTV2	75	52150	3	3	3	3	0.27	sp|Q8BTV2|CPSF7_MOUSE Cleavage and polyadenylation specificity factor subunit 7 OS=Mus musculus GN=Cpsf7 PE=1 SV=2
273	1	Uniprot_Mouse	A0A087WQA0	75	86272	3	3	3	3	0.16	tr|A0A087WQA0|A0A087WQA0_MOUSE Bcl-2-associated transcription factor 1 OS=Mus musculus GN=Bclaf1 PE=1 SV=1
274	1	Uniprot_Mouse	P28653	75	42069	3	3	3	3	0.35	sp|P28653|PGS1_MOUSE Biglycan OS=Mus musculus GN=Bgn PE=2 SV=1
275	1	Uniprot_Mouse	Q6A0A9	74	122766	4	4	3	3	0.11	sp|Q6A0A9|F120A_MOUSE Constitutive coactivator of PPAR-gamma-like protein 1 OS=Mus musculus GN=FAM120A PE=1 SV=2
276	1	Uniprot_Mouse	Q8BJH1	73	35757	2	2	2	2	0.27	sp|Q8BJH1|ZC21A_MOUSE Zinc finger C2HC domain-containing protein 1A OS=Mus musculus GN=Zc2hc1a PE=2 SV=1
277	1	Uniprot_Mouse	A2AE89	73	23692	3	3	2	2	0.42	tr|A2AE89|A2AE89_MOUSE Glutathione S-transferase Mu 1 (Fragment) OS=Mus musculus GN=Gstm1 PE=1 SV=1
278	1	Uniprot_Mouse	Q8K4Z5	72	88546	7	7	5	5	0.27	sp|Q8K4Z5|SF3A1_MOUSE Splicing factor 3A subunit 1 OS=Mus musculus GN=Sf3a1 PE=1 SV=1
279	1	Uniprot_Mouse	Q3UKJ7	72	58134	8	8	6	6	0.55	sp|Q3UKJ7|SMU1_MOUSE WD40 repeat-containing protein SMU1 OS=Mus musculus GN=Smu1 PE=2 SV=2
280	1	Uniprot_Mouse	A0A0B4J1H9	72	13540	1	1	1	1	0.36	tr|A0A0B4J1H9|A0A0B4J1H9_MOUSE Protein Igkv1-132 OS=Mus musculus GN=Igkv1-132 PE=4 SV=1
281	1	Uniprot_Mouse	Q504P4	72	68964	4	4	3	3	0.2	tr|Q504P4|Q504P4_MOUSE Heat shock cognate 71 kDa protein OS=Mus musculus GN=Hspa8 PE=1 SV=1
282	1	Uniprot_Mouse	Q6ZWZ7	72	21611	6	6	3	3	0.78	tr|Q6ZWZ7|Q6ZWZ7_MOUSE 60S ribosomal protein L17 OS=Mus musculus GN=Rpl17 PE=1 SV=1
283	1	Uniprot_Mouse	P62141	72	37961	2	2	2	2	0.25	sp|P62141|PP1B_MOUSE Serine/threonine-protein phosphatase PP1-beta catalytic subunit OS=Mus musculus GN=Ppp1cb PE=1 SV=3
284	1	Uniprot_Mouse	P08752	71	41033	3	3	3	3	0.36	sp|P08752|GNAI2_MOUSE Guanine nucleotide-binding protein G(i) subunit alpha-2 OS=Mus musculus GN=Gnai2 PE=1 SV=5
285	1	Uniprot_Mouse	D3Z4V1	71	56367	4	4	4	4	0.35	tr|D3Z4V1|D3Z4V1_MOUSE Pleiotropic regulator 1 OS=Mus musculus GN=Plrg1 PE=1 SV=1
286	1	Uniprot_Mouse	Q0VBL3	71	105886	5	5	4	4	0.17	tr|Q0VBL3|Q0VBL3_MOUSE Protein Rbm15 OS=Mus musculus GN=Rbm15 PE=1 SV=1
287	1	Uniprot_Mouse	Q99LF4	70	55727	4	4	3	3	0.26	sp|Q99LF4|RTCB_MOUSE tRNA-splicing ligase RtcB homolog OS=Mus musculus GN=Rtcb PE=2 SV=1
288	1	Uniprot_Mouse	Q91YR7	69	107453	2	2	2	2	0.08	sp|Q91YR7|PRP6_MOUSE Pre-mRNA-processing factor 6 OS=Mus musculus GN=Prpf6 PE=2 SV=1
289	1	Uniprot_Mouse	A0A075B5P8	69	12798	1	1	1	1	0.38	tr|A0A075B5P8|A0A075B5P8_MOUSE Protein Ighv2-2 (Fragment) OS=Mus musculus GN=Ighv2-2 PE=4 SV=1
290	1	Uniprot_Mouse	Q60737	68	45219	5	5	5	5	0.59	sp|Q60737|CSK21_MOUSE Casein kinase II subunit alpha OS=Mus musculus GN=Csnk2a1 PE=1 SV=2
291	1	Uniprot_Mouse	F6SVV1	68	21869	2	2	2	2	0.46	tr|F6SVV1|F6SVV1_MOUSE Protein Gm9493 OS=Mus musculus GN=Gm9493 PE=4 SV=1
292	1	Uniprot_Mouse	Q5SFM8	67	118935	3	3	3	3	0.11	sp|Q5SFM8|RBM27_MOUSE RNA-binding protein 27 OS=Mus musculus GN=Rbm27 PE=2 SV=3
293	1	Uniprot_Mouse	G3UW94	67	28321	3	3	2	2	0.34	tr|G3UW94|G3UW94_MOUSE MCG14259, isoform CRA_b OS=Mus musculus GN=U2af1 PE=1 SV=1
294	1	Uniprot_Mouse	Q9JJY4	67	92565	6	6	6	6	0.32	sp|Q9JJY4|DDX20_MOUSE Probable ATP-dependent RNA helicase DDX20 OS=Mus musculus GN=Ddx20 PE=1 SV=2
295	1	Uniprot_Mouse	A0A075B5T6	66	13707	2	2	2	2	0.83	tr|A0A075B5T6|A0A075B5T6_MOUSE Protein Ighv10-3 (Fragment) OS=Mus musculus GN=Ighv10-3 PE=4 SV=1
296	1	Uniprot_Mouse	P97314	66	21824	2	2	1	1	0.21	sp|P97314|CSRP2_MOUSE Cysteine and glycine-rich protein 2 OS=Mus musculus GN=Csrp2 PE=1 SV=3
297	1	Uniprot_Mouse	B1AV09	66	52929	5	5	4	4	0.38	tr|B1AV09|B1AV09_MOUSE Protein Luzp4 OS=Mus musculus GN=Luzp4 PE=4 SV=1
298	1	Uniprot_Mouse	A2AR01	65	14569	1	1	1	1	0.33	tr|A2AR01|A2AR01_MOUSE Peptidyl-prolyl cis-trans isomerase (Fragment) OS=Mus musculus GN=Ppig PE=1 SV=1
299	1	Uniprot_Mouse	Q9R0P5	65	18852	2	2	1	1	0.25	sp|Q9R0P5|DEST_MOUSE Destrin OS=Mus musculus GN=Dstn PE=1 SV=3
300	1	Uniprot_Mouse	P60867	65	13478	3	3	2	2	0.85	sp|P60867|RS20_MOUSE 40S ribosomal protein S20 OS=Mus musculus GN=Rps20 PE=1 SV=1
301	1	Uniprot_Mouse	P14106	65	26929	3	3	2	2	0.36	sp|P14106|C1QB_MOUSE Complement C1q subcomponent subunit B OS=Mus musculus GN=C1qb PE=1 SV=2
302	1	Uniprot_Mouse	G5E902	64	40167	3	3	3	3	0.37	tr|G5E902|G5E902_MOUSE MCG10343, isoform CRA_b OS=Mus musculus GN=Slc25a3 PE=1 SV=1
303	1	Uniprot_Mouse	B7FAU9	64	283177	4	4	4	4	0.06	tr|B7FAU9|B7FAU9_MOUSE Filamin, alpha OS=Mus musculus GN=Flna PE=1 SV=1
304	1	Uniprot_Mouse	A0A075B5L7	63	12571	1	1	1	1	0.39	tr|A0A075B5L7|A0A075B5L7_MOUSE Protein Igkv4-80 OS=Mus musculus GN=Igkv4-80 PE=4 SV=1
305	1	Uniprot_Mouse	Q9D358	63	18636	2	2	1	1	0.25	sp|Q9D358|PPAC_MOUSE Low molecular weight phosphotyrosine protein phosphatase OS=Mus musculus GN=Acp1 PE=1 SV=3
306	1	Uniprot_Mouse	Q99PU8	63	137723	3	3	3	3	0.1	sp|Q99PU8|DHX30_MOUSE Putative ATP-dependent RNA helicase DHX30 OS=Mus musculus GN=Dhx30 PE=2 SV=1
307	1	Uniprot_Mouse	P28301	62	47356	4	4	4	4	0.43	sp|P28301|LYOX_MOUSE Protein-lysine 6-oxidase OS=Mus musculus GN=Lox PE=1 SV=1
308	1	Uniprot_Mouse	E9Q7D8	62	24330	2	2	1	1	0.19	tr|E9Q7D8|E9Q7D8_MOUSE Poly(rC)-binding protein 3 OS=Mus musculus GN=Pcbp3 PE=1 SV=1
309	1	Uniprot_Mouse	H3BJ30	62	59444	2	2	2	2	0.15	tr|H3BJ30|H3BJ30_MOUSE Cleavage and polyadenylation-specificity factor subunit 6 OS=Mus musculus GN=Cpsf6 PE=1 SV=1
310	1	Uniprot_Mouse	Q3UDD3	62	43137	4	4	4	4	0.48	tr|Q3UDD3|Q3UDD3_MOUSE Polymerase delta-interacting protein 3 OS=Mus musculus GN=Poldip3 PE=1 SV=1
311	1	Uniprot_Mouse	P54320	62	72008	4	4	3	3	0.19	sp|P54320|ELN_MOUSE Elastin OS=Mus musculus GN=Eln PE=2 SV=2
312	1	Uniprot_Mouse	Q62419	62	41720	3	3	2	2	0.22	sp|Q62419|SH3G1_MOUSE Endophilin-A2 OS=Mus musculus GN=Sh3gl1 PE=1 SV=1
313	1	Uniprot_Mouse	B1ARA3	61	12210	7	7	4	4	2.85	tr|B1ARA3|B1ARA3_MOUSE 60S ribosomal protein L26 (Fragment) OS=Mus musculus GN=Rpl26 PE=1 SV=1
314	1	Uniprot_Mouse	D3YZC9	60	62002	4	4	4	4	0.31	tr|D3YZC9|D3YZC9_MOUSE Splicing factor 1 OS=Mus musculus GN=Sf1 PE=1 SV=1
315	1	Uniprot_Mouse	Q921K2	60	113506	6	6	6	6	0.25	tr|Q921K2|Q921K2_MOUSE Poly (ADP-ribose) polymerase family, member 1 OS=Mus musculus GN=Parp1 PE=1 SV=1
316	1	Uniprot_Mouse	E9Q3X0	59	97083	2	2	2	2	0.09	tr|E9Q3X0|E9Q3X0_MOUSE Major vault protein OS=Mus musculus GN=Mvp PE=1 SV=1
317	1	Student_Contaminants	Dulijuan	58	67950	1	1	1	1	0.06	Dulijuan
318	1	Uniprot_Mouse	P62754	58	28834	1	1	1	1	0.16	sp|P62754|RS6_MOUSE 40S ribosomal protein S6 OS=Mus musculus GN=Rps6 PE=1 SV=1
319	1	Uniprot_Mouse	P21956	58	52348	3	3	3	3	0.27	sp|P21956|MFGM_MOUSE Lactadherin OS=Mus musculus GN=Mfge8 PE=1 SV=3
320	1	Uniprot_Mouse	A0A075B5M1	58	10265	2	2	2	2	1.23	tr|A0A075B5M1|A0A075B5M1_MOUSE Protein Igkv4-63 OS=Mus musculus GN=Igkv4-63 PE=1 SV=1
321	1	Uniprot_Mouse	A0A075B5R0	57	13380	2	2	1	1	0.36	tr|A0A075B5R0|A0A075B5R0_MOUSE Protein Ighv5-16 OS=Mus musculus GN=Ighv5-16 PE=4 SV=1
322	1	Uniprot_Mouse	Q8CI08	57	62568	3	3	3	3	0.22	sp|Q8CI08|SLAI2_MOUSE SLAIN motif-containing protein 2 OS=Mus musculus GN=Slain2 PE=1 SV=2
323	1	Uniprot_Mouse	A0A075B5P1	57	13165	1	1	1	1	0.37	tr|A0A075B5P1|A0A075B5P1_MOUSE Protein Igkv3-1 OS=Mus musculus GN=Igkv3-1 PE=4 SV=4
324	1	Uniprot_Mouse	A0A075B5R5	56	13134	2	2	2	2	0.88	tr|A0A075B5R5|A0A075B5R5_MOUSE Protein Ighv4-1 (Fragment) OS=Mus musculus GN=Ighv4-1 PE=1 SV=4
325	1	Uniprot_Mouse	Q921M3	56	136548	2	2	2	2	0.06	sp|Q921M3|SF3B3_MOUSE Splicing factor 3B subunit 3 OS=Mus musculus GN=Sf3b3 PE=2 SV=1
326	1	Uniprot_Mouse	D3YWX2	56	241129	3	3	3	3	0.05	tr|D3YWX2|D3YWX2_MOUSE YLP motif-containing protein 1 OS=Mus musculus GN=Ylpm1 PE=1 SV=2
327	1	Uniprot_Mouse	F8WID5	55	37447	4	4	3	3	0.4	tr|F8WID5|F8WID5_MOUSE Tropomyosin alpha-1 chain OS=Mus musculus GN=Tpm1 PE=1 SV=1
328	1	Uniprot_Mouse	A0A075B677	55	10474	2	2	2	2	1.19	tr|A0A075B677|A0A075B677_MOUSE Protein Igkv4-53 OS=Mus musculus GN=Igkv4-53 PE=4 SV=1
329	1	Uniprot_Mouse	Q9Z1P6	55	12625	2	2	2	2	0.92	sp|Q9Z1P6|NDUA7_MOUSE NADH dehydrogenase [ubiquinone] 1 alpha subcomplex subunit 7 OS=Mus musculus GN=Ndufa7 PE=1 SV=3
330	1	Uniprot_Mouse	P59708	55	14690	1	1	1	1	0.33	sp|P59708|SF3B6_MOUSE Splicing factor 3B subunit 6 OS=Mus musculus GN=Sf3b6 PE=1 SV=1
331	1	Uniprot_Mouse	D3Z5I1	55	114001	2	2	1	1	0.04	tr|D3Z5I1|D3Z5I1_MOUSE Zinc finger CCCH-type antiviral protein 1 OS=Mus musculus GN=Zc3hav1 PE=1 SV=1
332	1	Uniprot_Mouse	Q922U1	54	77578	2	2	2	2	0.12	sp|Q922U1|PRPF3_MOUSE U4/U6 small nuclear ribonucleoprotein Prp3 OS=Mus musculus GN=Prpf3 PE=2 SV=1
333	1	Uniprot_Mouse	Q9DBR7	54	115383	1	1	1	1	0.04	sp|Q9DBR7|MYPT1_MOUSE Protein phosphatase 1 regulatory subunit 12A OS=Mus musculus GN=Ppp1r12a PE=1 SV=2
334	1	Uniprot_Mouse	P28654	54	40126	2	2	2	2	0.23	sp|P28654|PGS2_MOUSE Decorin OS=Mus musculus GN=Dcn PE=2 SV=1
335	1	Uniprot_Mouse	A0A087WPY7	53	18637	2	2	2	2	0.56	tr|A0A087WPY7|A0A087WPY7_MOUSE Protein Gm29289 (Fragment) OS=Mus musculus GN=Gm29289 PE=4 SV=3
336	1	Uniprot_Mouse	Q9Z1Y4	53	52383	3	3	2	2	0.17	sp|Q9Z1Y4|TRIP6_MOUSE Thyroid receptor-interacting protein 6 OS=Mus musculus GN=Trip6 PE=1 SV=1
337	1	Student_Contaminants	lifangtao	53	38151	2	2	2	2	0.25	lifangtao
338	1	Uniprot_Mouse	P97762	52	25474	4	4	4	4	0.93	sp|P97762|RP9_MOUSE Retinitis pigmentosa 9 protein homolog OS=Mus musculus GN=rp9 PE=1 SV=1
339	1	Uniprot_Mouse	Q9DAW6	52	59018	2	2	2	2	0.15	sp|Q9DAW6|PRP4_MOUSE U4/U6 small nuclear ribonucleoprotein Prp4 OS=Mus musculus GN=Prpf4 PE=1 SV=1
340	1	Uniprot_Mouse	A2AVJ7	52	158757	2	2	2	2	0.05	tr|A2AVJ7|A2AVJ7_MOUSE Ribosome-binding protein 1 OS=Mus musculus GN=Rrbp1 PE=1 SV=1
341	1	Uniprot_Mouse	D3YZ09	51	20606	2	2	1	1	0.22	tr|D3YZ09|D3YZ09_MOUSE H/ACA ribonucleoprotein complex subunit 1 (Fragment) OS=Mus musculus GN=Gar1 PE=1 SV=1
342	1	Uniprot_Mouse	A0A075B5X0	51	12988	1	1	1	1	0.37	tr|A0A075B5X0|A0A075B5X0_MOUSE Protein Ighv1-59 OS=Mus musculus GN=Ighv1-59 PE=4 SV=1
343	1	Uniprot_Mouse	Q14AA6	50	24456	3	3	2	2	0.41	tr|Q14AA6|Q14AA6_MOUSE MCG49183 OS=Mus musculus GN=1700009N14Rik PE=1 SV=1
344	1	Uniprot_Mouse	B2RXQ9	50	72474	2	2	2	2	0.12	tr|B2RXQ9|B2RXQ9_MOUSE Sorbin and SH3 domain-containing protein 2 OS=Mus musculus GN=Sorbs2 PE=1 SV=1
345	1	Uniprot_Mouse	Q8BFQ4	50	35456	3	3	3	3	0.43	sp|Q8BFQ4|WDR82_MOUSE WD repeat-containing protein 82 OS=Mus musculus GN=Wdr82 PE=1 SV=1
346	1	Uniprot_Mouse	Q9ERA6	50	96529	5	5	5	5	0.25	sp|Q9ERA6|TFP11_MOUSE Tuftelin-interacting protein 11 OS=Mus musculus GN=Tfip11 PE=1 SV=1
347	1	Uniprot_Mouse	Q52KC3	50	83152	3	3	3	3	0.16	tr|Q52KC3|Q52KC3_MOUSE DNA helicase OS=Mus musculus GN=Mcm5 PE=1 SV=1
348	1	Uniprot_Mouse	Q6ZWZ6	49	14905	3	3	1	1	0.32	tr|Q6ZWZ6|Q6ZWZ6_MOUSE 40S ribosomal protein S12 OS=Mus musculus GN=Rps12 PE=1 SV=1
349	1	Uniprot_Mouse	A0A075B5S2	49	13807	1	1	1	1	0.35	tr|A0A075B5S2|A0A075B5S2_MOUSE Uncharacterized protein (Fragment) OS=Mus musculus GN=Ighv7-1 PE=1 SV=2
350	1	Uniprot_Mouse	P06728	49	45001	2	2	2	2	0.21	sp|P06728|APOA4_MOUSE Apolipoprotein A-IV OS=Mus musculus GN=Apoa4 PE=1 SV=3
351	1	Uniprot_Mouse	Q3UJB0	49	98251	3	3	3	3	0.14	tr|Q3UJB0|Q3UJB0_MOUSE Protein Sf3b2 OS=Mus musculus GN=Sf3b2 PE=1 SV=1
352	1	Uniprot_Mouse	E9Q3W4	49	500625	4	4	4	4	0.03	tr|E9Q3W4|E9Q3W4_MOUSE Plectin OS=Mus musculus GN=Plec PE=1 SV=1
353	1	Uniprot_Mouse	B9EHJ3	48	189079	3	3	3	3	0.07	tr|B9EHJ3|B9EHJ3_MOUSE Tight junction protein ZO-1 OS=Mus musculus GN=Tjp1 PE=1 SV=1
354	1	Uniprot_Mouse	Q792Z1	48	26888	5	5	2	2	0.37	tr|Q792Z1|Q792Z1_MOUSE MCG140784 OS=Mus musculus GN=Try10 PE=1 SV=1
355	1	Student_Contaminants	Q3KUS7	48	86784	2	2	1	1	0.05	Q3KUS7 TREMBL:Q3KUS7 (Bos taurus) Complement factor B
356	1	Uniprot_Mouse	J3QMG3	48	31175	2	2	2	2	0.31	tr|J3QMG3|J3QMG3_MOUSE Voltage-dependent anion-selective channel protein 3 OS=Mus musculus GN=Vdac3 PE=1 SV=1
357	1	Uniprot_Mouse	Q5SS00	48	278082	7	7	1	1	0.02	sp|Q5SS00|ZDBF2_MOUSE DBF4-type zinc finger-containing protein 2 homolog OS=Mus musculus GN=Zdbf2 PE=2 SV=1
358	1	Uniprot_Mouse	P56480	47	56265	4	4	3	3	0.25	sp|P56480|ATPB_MOUSE ATP synthase subunit beta, mitochondrial OS=Mus musculus GN=Atp5b PE=1 SV=2
359	1	Uniprot_Mouse	Q6ZPZ3	47	141564	4	4	3	3	0.09	sp|Q6ZPZ3|ZC3H4_MOUSE Zinc finger CCCH domain-containing protein 4 OS=Mus musculus GN=Zc3h4 PE=1 SV=2
360	1	Student_Contaminants	Q3SZR3	47	23453	2	2	2	2	0.43	Q3SZR3 SWISS-PROT:Q3SZR3 (Bos taurus) Alpha-1-acid glycoprotein precursor
361	1	Uniprot_Mouse	B1AU25	47	66358	2	2	2	2	0.14	tr|B1AU25|B1AU25_MOUSE Apoptosis-inducing factor 1, mitochondrial OS=Mus musculus GN=Aifm1 PE=1 SV=1
362	1	Uniprot_Mouse	D3YUB9	47	18385	1	1	1	1	0.25	tr|D3YUB9|D3YUB9_MOUSE Polyadenylate-binding protein 2 (Fragment) OS=Mus musculus GN=Pabpn1 PE=4 SV=2
363	1	Uniprot_Mouse	Q3TJZ6	46	55477	1	1	1	1	0.08	sp|Q3TJZ6|FA98A_MOUSE Protein FAM98A OS=Mus musculus GN=Fam98a PE=2 SV=1
364	1	Uniprot_Mouse	P41105	46	15781	2	2	2	2	0.69	sp|P41105|RL28_MOUSE 60S ribosomal protein L28 OS=Mus musculus GN=Rpl28 PE=1 SV=2
365	1	Uniprot_Mouse	P01811	46	13106	1	1	1	1	0.37	sp|P01811|HVM41_MOUSE Ig heavy chain V region UPC10 OS=Mus musculus PE=1 SV=1
366	1	Uniprot_Mouse	G3UXG7	45	19141	1	1	1	1	0.24	tr|G3UXG7|G3UXG7_MOUSE Casein kinase II subunit beta OS=Mus musculus GN=Csnk2b PE=1 SV=1
367	1	Uniprot_Mouse	Q78IK2	45	6434	1	1	1	1	0.86	sp|Q78IK2|USMG5_MOUSE Up-regulated during skeletal muscle growth protein 5 OS=Mus musculus GN=Usmg5 PE=1 SV=1
368	1	Uniprot_Mouse	Q642K5	45	14464	2	2	1	1	0.33	tr|Q642K5|Q642K5_MOUSE 40S ribosomal protein S30 OS=Mus musculus GN=Fau PE=1 SV=1
369	1	Uniprot_Mouse	Q78XF5	44	16918	1	1	1	1	0.28	sp|Q78XF5|OSTC_MOUSE Oligosaccharyltransferase complex subunit OSTC OS=Mus musculus GN=Ostc PE=2 SV=1
370	1	Uniprot_Mouse	E0CZ72	44	84493	2	2	2	2	0.11	tr|E0CZ72|E0CZ72_MOUSE Kinesin-like protein OS=Mus musculus GN=Kif2a PE=1 SV=1
371	1	Uniprot_Mouse	D3Z6I7	44	63411	2	2	2	2	0.14	tr|D3Z6I7|D3Z6I7_MOUSE Protein Cald1 OS=Mus musculus GN=Cald1 PE=1 SV=1
372	1	Uniprot_Mouse	P97376	44	29394	2	2	1	1	0.15	sp|P97376|FRG1_MOUSE Protein FRG1 OS=Mus musculus GN=Frg1 PE=1 SV=2
373	1	Uniprot_Mouse	Q9D8N0	43	50371	2	2	2	2	0.18	sp|Q9D8N0|EF1G_MOUSE Elongation factor 1-gamma OS=Mus musculus GN=Eef1g PE=1 SV=3
374	1	Uniprot_Mouse	P62309	43	8547	1	1	1	1	0.61	sp|P62309|RUXG_MOUSE Small nuclear ribonucleoprotein G OS=Mus musculus GN=Snrpg PE=1 SV=1
375	1	Uniprot_Mouse	Q91YQ5	43	68657	1	1	1	1	0.06	sp|Q91YQ5|RPN1_MOUSE Dolichyl-diphosphooligosaccharide--protein glycosyltransferase subunit 1 OS=Mus musculus GN=Rpn1 PE=1 SV=1
376	1	Uniprot_Mouse	P20029	43	72492	4	4	4	4	0.26	sp|P20029|GRP78_MOUSE 78 kDa glucose-regulated protein OS=Mus musculus GN=Hspa5 PE=1 SV=3
377	1	Uniprot_Mouse	Q8BJ05	43	83326	2	2	1	1	0.05	sp|Q8BJ05|ZC3HE_MOUSE Zinc finger CCCH domain-containing protein 14 OS=Mus musculus GN=Zc3h14 PE=1 SV=1
378	1	Uniprot_Mouse	F6WA09	43	17466	2	2	2	2	0.61	tr|F6WA09|F6WA09_MOUSE 14-3-3 protein epsilon (Fragment) OS=Mus musculus GN=Ywhae PE=1 SV=1
379	1	Uniprot_Mouse	Q61029	43	50399	5	5	4	4	0.4	sp|Q61029|LAP2B_MOUSE Lamina-associated polypeptide 2, isoforms beta/delta/epsilon/gamma OS=Mus musculus GN=Tmpo PE=1 SV=4
380	1	Uniprot_Mouse	Q9ER05	43	28687	2	2	1	1	0.16	tr|Q9ER05|Q9ER05_MOUSE Chymopasin OS=Mus musculus GN=Ctrl PE=1 SV=1
381	1	Uniprot_Mouse	P01844	42	11419	2	2	1	1	0.43	sp|P01844|LAC2_MOUSE Ig lambda-2 chain C region OS=Mus musculus GN=Iglc2 PE=1 SV=1
382	1	Uniprot_Mouse	Q60865	42	78292	1	1	1	1	0.06	sp|Q60865|CAPR1_MOUSE Caprin-1 OS=Mus musculus GN=Caprin1 PE=1 SV=2
383	1	Student_Contaminants	lijin	42	42608	1	1	1	1	0.1	lijin
384	1	Uniprot_Mouse	V9GX31	42	8612	1	1	1	1	0.6	tr|V9GX31|V9GX31_MOUSE Uncharacterized protein OS=Mus musculus GN=Gm12728 PE=3 SV=1
385	1	Uniprot_Mouse	O88844	42	47044	3	3	3	3	0.31	sp|O88844|IDHC_MOUSE Isocitrate dehydrogenase [NADP] cytoplasmic OS=Mus musculus GN=Idh1 PE=1 SV=2
386	1	Uniprot_Mouse	Q80XK6	42	233192	3	3	1	1	0.02	sp|Q80XK6|ATG2B_MOUSE Autophagy-related protein 2 homolog B OS=Mus musculus GN=Atg2b PE=1 SV=3
387	1	Uniprot_Mouse	Q3TUQ5	42	82626	4	4	4	4	0.23	tr|Q3TUQ5|Q3TUQ5_MOUSE Pinin OS=Mus musculus GN=Pnn PE=1 SV=1
388	1	Uniprot_Mouse	D3Z4J1	41	19580	2	2	2	2	0.53	tr|D3Z4J1|D3Z4J1_MOUSE DAZ-associated protein 1 (Fragment) OS=Mus musculus GN=Dazap1 PE=1 SV=1
389	1	Uniprot_Mouse	P63038	41	61088	3	3	3	3	0.23	sp|P63038|CH60_MOUSE 60 kDa heat shock protein, mitochondrial OS=Mus musculus GN=Hspd1 PE=1 SV=1
390	1	Uniprot_Mouse	P16045	41	15198	2	2	2	2	0.72	sp|P16045|LEG1_MOUSE Galectin-1 OS=Mus musculus GN=Lgals1 PE=1 SV=3
391	1	Uniprot_Mouse	Q9DCT8	41	23510	1	1	1	1	0.19	sp|Q9DCT8|CRIP2_MOUSE Cysteine-rich protein 2 OS=Mus musculus GN=Crip2 PE=1 SV=1
392	1	Uniprot_Mouse	A2A547	41	23347	2	2	1	1	0.2	tr|A2A547|A2A547_MOUSE Ribosomal protein L19 OS=Mus musculus GN=Rpl19 PE=1 SV=1
393	1	Uniprot_Mouse	A0A075B5N6	40	13712	2	2	1	1	0.35	tr|A0A075B5N6|A0A075B5N6_MOUSE Protein Igkv8-16 OS=Mus musculus GN=Igkv8-16 PE=1 SV=4
394	1	Uniprot_Mouse	A0A087WPN7	40	11450	1	1	1	1	0.43	tr|A0A087WPN7|A0A087WPN7_MOUSE Protein Ighv13-1 OS=Mus musculus GN=Ighv13-2 PE=4 SV=2
395	1	Uniprot_Mouse	Q5RL57	40	71826	1	1	1	1	0.06	tr|Q5RL57|Q5RL57_MOUSE A kinase (PRKA) anchor protein 8-like OS=Mus musculus GN=Akap8l PE=1 SV=1
396	1	Uniprot_Mouse	A2BGG7	40	24726	1	1	1	1	0.18	tr|A2BGG7|A2BGG7_MOUSE Nuclease-sensitive element-binding protein 1 (Fragment) OS=Mus musculus GN=Ybx1 PE=1 SV=1
397	1	Uniprot_Mouse	A0A075B5T7	40	13266	3	3	1	1	0.36	tr|A0A075B5T7|A0A075B5T7_MOUSE Protein Ighv1-7 (Fragment) OS=Mus musculus GN=Ighv1-7 PE=4 SV=1
398	1	Uniprot_Mouse	Q5SWZ5	40	259124	2	2	2	2	0.03	tr|Q5SWZ5|Q5SWZ5_MOUSE Myosin phosphatase Rho-interacting protein OS=Mus musculus GN=Mprip PE=1 SV=1
399	1	Uniprot_Mouse	Q6ZWV7	40	14544	1	1	1	1	0.33	sp|Q6ZWV7|RL35_MOUSE 60S ribosomal protein L35 OS=Mus musculus GN=Rpl35 PE=2 SV=1
400	1	Uniprot_Mouse	A0A0B4J1J4	39	13460	2	2	1	1	0.36	tr|A0A0B4J1J4|A0A0B4J1J4_MOUSE Protein Ighv9-2 (Fragment) OS=Mus musculus GN=Ighv9-2 PE=4 SV=1
401	1	Uniprot_Mouse	P21981	39	78153	1	1	1	1	0.06	sp|P21981|TGM2_MOUSE Protein-glutamine gamma-glutamyltransferase 2 OS=Mus musculus GN=Tgm2 PE=1 SV=4
402	1	Uniprot_Mouse	F6RDR0	39	18041	2	2	2	2	0.58	tr|F6RDR0|F6RDR0_MOUSE Alpha-adducin (Fragment) OS=Mus musculus GN=Add1 PE=1 SV=1
403	1	Uniprot_Mouse	P50608	39	43427	2	2	2	2	0.21	sp|P50608|FMOD_MOUSE Fibromodulin OS=Mus musculus GN=Fmod PE=2 SV=1
404	1	Uniprot_Mouse	G3UYG6	38	148774	4	4	3	3	0.09	tr|G3UYG6|G3UYG6_MOUSE PERQ amino acid-rich with GYF domain-containing protein 2 OS=Mus musculus GN=Gigyf2 PE=1 SV=1
405	1	Uniprot_Mouse	P0C0S6	38	13545	1	1	1	1	0.36	sp|P0C0S6|H2AZ_MOUSE Histone H2A.Z OS=Mus musculus GN=H2afz PE=1 SV=2
406	1	Uniprot_Mouse	A2AEP8	38	41475	3	3	3	3	0.36	tr|A2AEP8|A2AEP8_MOUSE 3 beta-hydroxysteroid dehydrogenase/Delta 5-->4-isomerase type 1 OS=Mus musculus GN=Hsd3b1 PE=1 SV=1
407	1	Uniprot_Mouse	Q9CY58	38	44801	1	1	1	1	0.1	sp|Q9CY58|PAIRB_MOUSE Plasminogen activator inhibitor 1 RNA-binding protein OS=Mus musculus GN=Serbp1 PE=1 SV=2
408	1	Uniprot_Mouse	P14733	38	66973	1	1	1	1	0.07	sp|P14733|LMNB1_MOUSE Lamin-B1 OS=Mus musculus GN=Lmnb1 PE=1 SV=3
409	1	Uniprot_Mouse	T1ECW4	37	20933	5	5	3	3	0.82	tr|T1ECW4|T1ECW4_MOUSE RNA-binding protein with multiple-splicing OS=Mus musculus GN=Rbpms PE=1 SV=1
410	1	Uniprot_Mouse	Q9QYB5	37	79070	2	2	2	2	0.11	sp|Q9QYB5|ADDG_MOUSE Gamma-adducin OS=Mus musculus GN=Add3 PE=1 SV=2
411	1	Uniprot_Mouse	Q8BWY3	37	49228	1	1	1	1	0.09	sp|Q8BWY3|ERF1_MOUSE Eukaryotic peptide chain release factor subunit 1 OS=Mus musculus GN=Etf1 PE=1 SV=4
412	1	Uniprot_Mouse	Q06185	37	8230	1	1	1	1	0.64	sp|Q06185|ATP5I_MOUSE ATP synthase subunit e, mitochondrial OS=Mus musculus GN=Atp5i PE=1 SV=2
413	1	Uniprot_Mouse	P01745	37	13241	1	1	1	1	0.37	sp|P01745|HVM01_MOUSE Ig heavy chain V region MPC 11 OS=Mus musculus PE=4 SV=1
414	1	Uniprot_Mouse	Q9WUM5	37	36474	1	1	1	1	0.12	sp|Q9WUM5|SUCA_MOUSE Succinyl-CoA ligase [ADP/GDP-forming] subunit alpha, mitochondrial OS=Mus musculus GN=Suclg1 PE=1 SV=4
415	1	Uniprot_Mouse	P09405	37	76734	2	2	2	2	0.12	sp|P09405|NUCL_MOUSE Nucleolin OS=Mus musculus GN=Ncl PE=1 SV=2
416	1	Uniprot_Mouse	D3Z6F5	37	54675	2	2	2	2	0.17	tr|D3Z6F5|D3Z6F5_MOUSE ATP synthase subunit alpha OS=Mus musculus GN=Atp5a1 PE=1 SV=1
417	1	Uniprot_Mouse	E9PUE2	37	63493	4	4	1	1	0.07	tr|E9PUE2|E9PUE2_MOUSE Ubiquitin carboxyl-terminal hydrolase OS=Mus musculus GN=Usp21 PE=3 SV=1
418	1	Uniprot_Mouse	Q9DC48	37	66104	1	1	1	1	0.07	sp|Q9DC48|PRP17_MOUSE Pre-mRNA-processing factor 17 OS=Mus musculus GN=Cdc40 PE=2 SV=1
419	1	Student_Contaminants	P02777	36	24625	1	1	1	1	0.18	P02777 SWISS-PROT:P02777 (Bos taurus) similar to Platelet factor 4
420	1	Uniprot_Mouse	A0A0B4J1J5	36	13101	3	3	2	2	0.88	tr|A0A0B4J1J5|A0A0B4J1J5_MOUSE Protein Ighv9-3 (Fragment) OS=Mus musculus GN=Ighv9-3 PE=1 SV=1
421	1	Uniprot_Mouse	P62315	36	13273	1	1	1	1	0.36	sp|P62315|SMD1_MOUSE Small nuclear ribonucleoprotein Sm D1 OS=Mus musculus GN=Snrpd1 PE=3 SV=1
422	1	Uniprot_Mouse	Q91VN6	36	70459	4	4	4	4	0.27	sp|Q91VN6|DDX41_MOUSE Probable ATP-dependent RNA helicase DDX41 OS=Mus musculus GN=Ddx41 PE=1 SV=2
423	1	Uniprot_Mouse	F8WHP8	36	9057	2	2	1	1	0.56	tr|F8WHP8|F8WHP8_MOUSE ATP synthase subunit f, mitochondrial OS=Mus musculus GN=Atp5j2 PE=1 SV=1
424	1	Uniprot_Mouse	H3BKG2	36	17530	1	1	1	1	0.27	tr|H3BKG2|H3BKG2_MOUSE T-complex protein 1 subunit theta (Fragment) OS=Mus musculus GN=Cct8 PE=1 SV=1
425	1	Uniprot_Mouse	Q921W2	36	41846	2	2	2	2	0.22	tr|Q921W2|Q921W2_MOUSE Nucleolysin TIAR OS=Mus musculus GN=Tial1 PE=1 SV=1
426	1	Uniprot_Mouse	D3Z456	36	34258	1	1	1	1	0.13	tr|D3Z456|D3Z456_MOUSE 39S ribosomal protein L3, mitochondrial OS=Mus musculus GN=Mrpl3 PE=1 SV=1
427	1	Uniprot_Mouse	E0CYF8	36	11112	1	1	1	1	0.45	tr|E0CYF8|E0CYF8_MOUSE Pre-mRNA-splicing factor SYF1 OS=Mus musculus GN=Xab2 PE=1 SV=1
428	1	Uniprot_Mouse	Q9QZF2	36	62404	1	1	1	1	0.07	sp|Q9QZF2|GPC1_MOUSE Glypican-1 OS=Mus musculus GN=Gpc1 PE=1 SV=1
429	1	Uniprot_Mouse	G3X9D5	36	13419	1	1	1	1	0.36	tr|G3X9D5|G3X9D5_MOUSE Histone H2B type 2-B OS=Mus musculus GN=Hist2h2bb PE=1 SV=1
430	1	Uniprot_Mouse	G3X9I4	36	23828	1	1	1	1	0.19	tr|G3X9I4|G3X9I4_MOUSE Aly/REF export factor 2 OS=Mus musculus GN=Alyref2 PE=1 SV=1
431	1	Uniprot_Mouse	Q9JHU4	36	534447	4	4	3	3	0.02	sp|Q9JHU4|DYHC1_MOUSE Cytoplasmic dynein 1 heavy chain 1 OS=Mus musculus GN=Dync1h1 PE=1 SV=2
432	1	Uniprot_Mouse	Q9JKK7	35	39487	1	1	1	1	0.11	sp|Q9JKK7|TMOD2_MOUSE Tropomodulin-2 OS=Mus musculus GN=Tmod2 PE=1 SV=2
433	1	Uniprot_Mouse	Q8BJ95	35	55822	1	1	1	1	0.08	tr|Q8BJ95|Q8BJ95_MOUSE Protein F830045P16Rik OS=Mus musculus GN=F830045P16Rik PE=2 SV=1
434	1	Uniprot_Mouse	Q9QZ82	35	60447	4	4	4	4	0.32	sp|Q9QZ82|CP11A_MOUSE Cholesterol side-chain cleavage enzyme, mitochondrial OS=Mus musculus GN=Cyp11a1 PE=2 SV=1
435	1	Uniprot_Mouse	E0CZ27	35	13371	1	1	1	1	0.36	tr|E0CZ27|E0CZ27_MOUSE Histone H3 (Fragment) OS=Mus musculus GN=H3f3a PE=3 SV=1
436	1	Uniprot_Mouse	P16460	35	46840	5	5	4	4	0.43	sp|P16460|ASSY_MOUSE Argininosuccinate synthase OS=Mus musculus GN=Ass1 PE=1 SV=1
437	1	Uniprot_Mouse	A0A075B5Q6	35	13230	2	2	1	1	0.37	tr|A0A075B5Q6|A0A075B5Q6_MOUSE Protein Ighv5-9-1 OS=Mus musculus GN=Ighv5-9-1 PE=1 SV=1
438	1	Uniprot_Mouse	O55176	35	64608	1	1	1	1	0.07	sp|O55176|PJA1_MOUSE E3 ubiquitin-protein ligase Praja-1 OS=Mus musculus GN=Pja1 PE=1 SV=3
439	1	Uniprot_Mouse	Q8BU11	35	66376	1	1	1	1	0.07	sp|Q8BU11|TOX4_MOUSE TOX high mobility group box family member 4 OS=Mus musculus GN=Tox4 PE=1 SV=3
440	1	Uniprot_Mouse	G5E839	34	55340	1	1	1	1	0.08	tr|G5E839|G5E839_MOUSE T-complex protein 1 subunit delta OS=Mus musculus GN=Cct4 PE=1 SV=1
441	1	Uniprot_Mouse	P62305	34	10854	2	2	2	2	1.12	sp|P62305|RUXE_MOUSE Small nuclear ribonucleoprotein E OS=Mus musculus GN=Snrpe PE=3 SV=1
442	1	Uniprot_Mouse	A2AW05	34	71826	1	1	1	1	0.06	tr|A2AW05|A2AW05_MOUSE FACT complex subunit SSRP1 (Fragment) OS=Mus musculus GN=Ssrp1 PE=1 SV=1
443	1	Uniprot_Mouse	Q9Z0U1	34	131428	2	2	1	1	0.03	sp|Q9Z0U1|ZO2_MOUSE Tight junction protein ZO-2 OS=Mus musculus GN=Tjp2 PE=1 SV=2
444	1	Uniprot_Mouse	Q9D7S7	34	14459	1	1	1	1	0.33	sp|Q9D7S7|RL22L_MOUSE 60S ribosomal protein L22-like 1 OS=Mus musculus GN=Rpl22l1 PE=1 SV=1
445	1	Uniprot_Mouse	Q9DBR1	33	109588	2	2	2	2	0.08	sp|Q9DBR1|XRN2_MOUSE 5'-3' exoribonuclease 2 OS=Mus musculus GN=Xrn2 PE=1 SV=1
446	1	Uniprot_Mouse	B8JJX7	33	17838	1	1	1	1	0.26	tr|B8JJX7|B8JJX7_MOUSE Survival motor neuron protein (Fragment) OS=Mus musculus GN=Smn1 PE=1 SV=5
447	1	Uniprot_Mouse	P29341	33	70854	2	2	2	2	0.13	sp|P29341|PABP1_MOUSE Polyadenylate-binding protein 1 OS=Mus musculus GN=Pabpc1 PE=1 SV=2
448	1	Uniprot_Mouse	E9Q5F9	33	288394	1	1	1	1	0.01	sp|E9Q5F9|SETD2_MOUSE Histone-lysine N-methyltransferase SETD2 OS=Mus musculus GN=Setd2 PE=1 SV=1
449	1	Uniprot_Mouse	P26151	33	45259	2	2	2	2	0.2	sp|P26151|FCGR1_MOUSE High affinity immunoglobulin gamma Fc receptor I OS=Mus musculus GN=Fcgr1 PE=1 SV=1
450	1	Student_Contaminants	RabE1C	32	23991	1	1	1	1	0.19	RabE1C
451	1	Uniprot_Mouse	P98086	32	26186	2	2	2	2	0.38	sp|P98086|C1QA_MOUSE Complement C1q subcomponent subunit A OS=Mus musculus GN=C1qa PE=1 SV=2
452	1	Uniprot_Mouse	O55142	32	12660	3	3	2	2	0.92	sp|O55142|RL35A_MOUSE 60S ribosomal protein L35a OS=Mus musculus GN=Rpl35a PE=1 SV=2
453	1	Uniprot_Mouse	E9Q616	32	604664	1	1	1	1	0.01	tr|E9Q616|E9Q616_MOUSE Protein Ahnak OS=Mus musculus GN=Ahnak PE=1 SV=1
454	1	Student_Contaminants	Q86YZ3	32	283140	2	2	1	1	0.02	Q86YZ3 SWISS-PROT:Q86YZ3 Tax_Id=9606 Gene_Symbol=HRNR Hornerin
455	1	Uniprot_Mouse	A0A075B5Q2	32	12958	1	1	1	1	0.37	tr|A0A075B5Q2|A0A075B5Q2_MOUSE Protein Ighv5-9 (Fragment) OS=Mus musculus GN=Ighv5-9 PE=4 SV=1
456	1	Uniprot_Mouse	Q9ESS2	32	18972	1	1	1	1	0.25	sp|Q9ESS2|FGF22_MOUSE Fibroblast growth factor 22 OS=Mus musculus GN=Fgf22 PE=2 SV=1
457	1	Uniprot_Mouse	A2A6Q2	31	21034	1	1	1	1	0.22	tr|A2A6Q2|A2A6Q2_MOUSE Cdc42 effector protein 4 (Fragment) OS=Mus musculus GN=Cdc42ep4 PE=1 SV=5
458	1	Uniprot_Mouse	Q91Z49	31	35923	1	1	1	1	0.12	sp|Q91Z49|UIF_MOUSE UAP56-interacting factor OS=Mus musculus GN=Fyttd1 PE=1 SV=1
459	1	Uniprot_Mouse	A0A075B6D5	31	12994	1	1	1	1	0.37	tr|A0A075B6D5|A0A075B6D5_MOUSE Protein Igkv19-93 OS=Mus musculus GN=Igkv19-93 PE=1 SV=4
460	1	Uniprot_Mouse	Q5F2E7	31	75668	1	1	1	1	0.06	sp|Q5F2E7|NUFP2_MOUSE Nuclear fragile X mental retardation-interacting protein 2 OS=Mus musculus GN=Nufip2 PE=1 SV=1
461	1	Uniprot_Mouse	Q9QZZ6	31	24549	1	1	1	1	0.19	sp|Q9QZZ6|DERM_MOUSE Dermatopontin OS=Mus musculus GN=Dpt PE=2 SV=1
462	1	Uniprot_Mouse	P01741	31	12661	1	1	1	1	0.38	sp|P01741|HVM00_MOUSE Ig heavy chain V region OS=Mus musculus PE=1 SV=1
463	1	Uniprot_Mouse	Q8CI51	31	64514	1	1	1	1	0.07	sp|Q8CI51|PDLI5_MOUSE PDZ and LIM domain protein 5 OS=Mus musculus GN=Pdlim5 PE=1 SV=4
464	1	Uniprot_Mouse	Q99MJ9	31	82695	2	2	2	2	0.11	sp|Q99MJ9|DDX50_MOUSE ATP-dependent RNA helicase DDX50 OS=Mus musculus GN=Ddx50 PE=2 SV=1
465	1	Uniprot_Mouse	Q9ESX4	31	27853	2	2	1	1	0.16	sp|Q9ESX4|NO40_MOUSE Nucleolar protein of 40 kDa OS=Mus musculus GN=Zcchc17 PE=1 SV=1
466	1	Uniprot_Mouse	D3YV75	30	24826	1	1	1	1	0.18	tr|D3YV75|D3YV75_MOUSE Nitric oxide synthase-interacting protein (Fragment) OS=Mus musculus GN=Nosip PE=1 SV=1
467	1	Uniprot_Mouse	J3QK23	30	31720	1	1	1	1	0.14	tr|J3QK23|J3QK23_MOUSE Uncharacterized protein OS=Mus musculus GN=Gm9825 PE=4 SV=1
468	1	Uniprot_Mouse	P01642	30	12721	2	2	1	1	0.38	sp|P01642|KV5A9_MOUSE Ig kappa chain V-V region L7 (Fragment) OS=Mus musculus GN=Gm10881 PE=1 SV=1
469	1	Uniprot_Mouse	Q80VY2	30	33668	1	1	1	1	0.13	sp|Q80VY2|F212B_MOUSE Protein FAM212B OS=Mus musculus GN=Fam212b PE=2 SV=1
470	1	Student_Contaminants	P12763	30	39193	1	1	1	1	0.11	P12763 SWISS-PROT:P12763 (Bos taurus) Alpha-2-HS-glycoprotein precursor
471	1	Uniprot_Mouse	D3Z0M9	30	95778	3	3	3	3	0.14	tr|D3Z0M9|D3Z0M9_MOUSE MCG18410, isoform CRA_a OS=Mus musculus GN=Ddx23 PE=1 SV=1
472	1	Uniprot_Mouse	Q9WTI7	30	122723	2	2	2	2	0.07	sp|Q9WTI7|MYO1C_MOUSE Unconventional myosin-Ic OS=Mus musculus GN=Myo1c PE=1 SV=2
473	1	Uniprot_Mouse	Q9CQQ4	29	30878	1	1	1	1	0.15	sp|Q9CQQ4|GEMI2_MOUSE Gem-associated protein 2 OS=Mus musculus GN=Gemin2 PE=2 SV=1
474	1	Uniprot_Mouse	Q8BGT7	29	26908	1	1	1	1	0.17	sp|Q8BGT7|SPF30_MOUSE Survival of motor neuron-related-splicing factor 30 OS=Mus musculus GN=Smndc1 PE=2 SV=1
475	1	Uniprot_Mouse	P38647	29	73701	1	1	1	1	0.06	sp|P38647|GRP75_MOUSE Stress-70 protein, mitochondrial OS=Mus musculus GN=Hspa9 PE=1 SV=3
476	1	Uniprot_Mouse	D6RIL6	29	32955	1	1	1	1	0.14	tr|D6RIL6|D6RIL6_MOUSE Isocitrate dehydrogenase [NADP], mitochondrial OS=Mus musculus GN=Idh2 PE=1 SV=1
477	1	Uniprot_Mouse	D3Z2T9	29	22936	1	1	1	1	0.2	tr|D3Z2T9|D3Z2T9_MOUSE Cyclin-dependent kinase 1 (Fragment) OS=Mus musculus GN=Cdk1 PE=1 SV=1
478	1	Uniprot_Mouse	Q920I9	29	165797	1	1	1	1	0.03	sp|Q920I9|WDR7_MOUSE WD repeat-containing protein 7 OS=Mus musculus GN=Wdr7 PE=1 SV=3
479	1	Uniprot_Mouse	A0A075B5W6	29	12850	1	1	1	1	0.38	tr|A0A075B5W6|A0A075B5W6_MOUSE Protein Ighv1-55 (Fragment) OS=Mus musculus GN=Ighv1-55 PE=4 SV=1
480	1	Uniprot_Mouse	Q9D735	28	18422	1	1	1	1	0.25	sp|Q9D735|CS043_MOUSE Uncharacterized protein C19orf43 homolog OS=Mus musculus PE=1 SV=1
481	1	Uniprot_Mouse	Q8BHM9	28	50201	5	5	1	1	0.09	sp|Q8BHM9|TM11F_MOUSE Transmembrane protease serine 11F OS=Mus musculus GN=Tmprss11f PE=2 SV=1
482	1	Uniprot_Mouse	P80314	28	57783	1	1	1	1	0.08	sp|P80314|TCPB_MOUSE T-complex protein 1 subunit beta OS=Mus musculus GN=Cct2 PE=1 SV=4
483	1	Uniprot_Mouse	Q8BVL3	28	53049	1	1	1	1	0.08	sp|Q8BVL3|SNX17_MOUSE Sorting nexin-17 OS=Mus musculus GN=Snx17 PE=1 SV=2
484	1	Uniprot_Mouse	B1B0C9	28	164644	1	1	1	1	0.03	tr|B1B0C9|B1B0C9_MOUSE Nik-related protein kinase OS=Mus musculus GN=Nrk PE=1 SV=1
485	1	Uniprot_Mouse	E9Q784	28	204376	2	2	2	2	0.04	tr|E9Q784|E9Q784_MOUSE Protein Zc3h13 OS=Mus musculus GN=Zc3h13 PE=1 SV=1
486	1	Uniprot_Mouse	Q62318	28	90558	2	2	2	2	0.1	sp|Q62318|TIF1B_MOUSE Transcription intermediary factor 1-beta OS=Mus musculus GN=Trim28 PE=1 SV=3
487	1	Uniprot_Mouse	A0A0A6YY60	28	13278	1	1	1	1	0.36	tr|A0A0A6YY60|A0A0A6YY60_MOUSE Protein Ighv8-5 (Fragment) OS=Mus musculus GN=Ighv8-5 PE=4 SV=1
488	1	Uniprot_Mouse	F6THG2	28	11306	2	2	2	2	1.06	tr|F6THG2|F6THG2_MOUSE Actin-related protein 2/3 complex subunit 1B (Fragment) OS=Mus musculus GN=Arpc1b PE=1 SV=1
489	1	Uniprot_Mouse	A2ASS6	28	3933362	3	3	2	2	0	sp|A2ASS6|TITIN_MOUSE Titin OS=Mus musculus GN=Ttn PE=1 SV=1
490	1	Uniprot_Mouse	Q9WVA3	28	37330	2	2	2	2	0.25	sp|Q9WVA3|BUB3_MOUSE Mitotic checkpoint protein BUB3 OS=Mus musculus GN=Bub3 PE=2 SV=2
491	1	Uniprot_Mouse	O70194	28	64576	1	1	1	1	0.07	sp|O70194|EIF3D_MOUSE Eukaryotic translation initiation factor 3 subunit D OS=Mus musculus GN=Eif3d PE=1 SV=2
492	1	Uniprot_Mouse	Q8K2B3	27	73623	1	1	1	1	0.06	sp|Q8K2B3|SDHA_MOUSE Succinate dehydrogenase [ubiquinone] flavoprotein subunit, mitochondrial OS=Mus musculus GN=Sdha PE=1 SV=1
493	1	Uniprot_Mouse	Q8CIG8	27	73318	1	1	1	1	0.06	sp|Q8CIG8|ANM5_MOUSE Protein arginine N-methyltransferase 5 OS=Mus musculus GN=Prmt5 PE=1 SV=3
494	1	Uniprot_Mouse	A0A0A6YXN6	27	21987	1	1	1	1	0.21	tr|A0A0A6YXN6|A0A0A6YXN6_MOUSE Zinc finger CCCH domain-containing protein 11A (Fragment) OS=Mus musculus GN=Zc3h11a PE=1 SV=1
495	1	Uniprot_Mouse	F8VPT3	27	218748	1	1	1	1	0.02	tr|F8VPT3|F8VPT3_MOUSE Protein Lct OS=Mus musculus GN=Lct PE=1 SV=1
496	1	Student_Contaminants	Streptavidin	27	16612	1	1	1	1	0.28	Streptavidin (S.avidinii)
497	1	Uniprot_Mouse	A2AGH6	27	247144	1	1	1	1	0.02	sp|A2AGH6|MED12_MOUSE Mediator of RNA polymerase II transcription subunit 12 OS=Mus musculus GN=Med12 PE=1 SV=1
498	1	Uniprot_Mouse	B1AUX2	27	216799	2	2	2	2	0.04	tr|B1AUX2|B1AUX2_MOUSE Host cell factor 1 OS=Mus musculus GN=Hcfc1 PE=1 SV=1
499	1	Uniprot_Mouse	G3UWF0	26	21668	1	1	1	1	0.21	tr|G3UWF0|G3UWF0_MOUSE Myelin-associated neurite-outgrowth inhibitor OS=Mus musculus GN=Fam168b PE=1 SV=1
500	1	Uniprot_Mouse	Q3UGC7	26	29440	1	1	1	1	0.15	sp|Q3UGC7|EI3JA_MOUSE Eukaryotic translation initiation factor 3 subunit J-A OS=Mus musculus GN=Eif3j1 PE=2 SV=1
501	1	Uniprot_Mouse	F6VJC5	26	83791	1	1	1	1	0.05	tr|F6VJC5|F6VJC5_MOUSE Protein Sec24b (Fragment) OS=Mus musculus GN=Sec24b PE=1 SV=1
502	1	Uniprot_Mouse	Q3TTL3	26	62556	1	1	1	1	0.07	tr|Q3TTL3|Q3TTL3_MOUSE SPATA7 isoform OS=Mus musculus GN=Spata7 PE=2 SV=1
503	1	Uniprot_Mouse	Q9CQ69	26	9762	1	1	1	1	0.52	sp|Q9CQ69|QCR8_MOUSE Cytochrome b-c1 complex subunit 8 OS=Mus musculus GN=Uqcrq PE=1 SV=3
504	1	Uniprot_Mouse	A2A8L5	26	212439	1	1	1	1	0.02	sp|A2A8L5|PTPRF_MOUSE Receptor-type tyrosine-protein phosphatase F OS=Mus musculus GN=Ptprf PE=1 SV=1
505	1	Uniprot_Mouse	Q9EP71	26	109470	3	3	3	3	0.12	sp|Q9EP71|RAI14_MOUSE Ankycorbin OS=Mus musculus GN=Rai14 PE=1 SV=1
506	1	Uniprot_Mouse	Q9D0W5	25	18339	1	1	1	1	0.25	sp|Q9D0W5|PPIL1_MOUSE Peptidyl-prolyl cis-trans isomerase-like 1 OS=Mus musculus GN=Ppil1 PE=2 SV=1
507	1	Uniprot_Mouse	E9Q3U5	25	8957	2	2	1	1	0.57	tr|E9Q3U5|E9Q3U5_MOUSE N-alpha-acetyltransferase 16, NatA auxiliary subunit OS=Mus musculus GN=Naa16 PE=4 SV=1
508	1	Uniprot_Mouse	F6RWZ9	25	19120	1	1	1	1	0.24	tr|F6RWZ9|F6RWZ9_MOUSE Calcium/calmodulin-dependent protein kinase type II subunit delta (Fragment) OS=Mus musculus GN=Camk2d PE=1 SV=1
509	1	Uniprot_Mouse	Q99MR6	25	100846	1	1	1	1	0.04	sp|Q99MR6|SRRT_MOUSE Serrate RNA effector molecule homolog OS=Mus musculus GN=Srrt PE=1 SV=1
510	1	Uniprot_Mouse	Q6P1F6	25	52173	2	2	2	2	0.18	sp|Q6P1F6|2ABA_MOUSE Serine/threonine-protein phosphatase 2A 55 kDa regulatory subunit B alpha isoform OS=Mus musculus GN=Ppp2r2a PE=1 SV=1
511	1	Uniprot_Mouse	F6ZJ27	25	44585	2	2	1	1	0.1	tr|F6ZJ27|F6ZJ27_MOUSE Enhancer of mRNA-decapping protein 4 (Fragment) OS=Mus musculus GN=Edc4 PE=1 SV=1
512	1	Uniprot_Mouse	A0A075B5Q3	25	12719	1	1	1	1	0.38	tr|A0A075B5Q3|A0A075B5Q3_MOUSE Protein Ighv2-5 OS=Mus musculus GN=Ighv2-5 PE=4 SV=1
513	1	Uniprot_Mouse	A2A9M4	25	84141	1	1	1	1	0.05	tr|A2A9M4|A2A9M4_MOUSE Dedicator of cytokinesis protein 7 (Fragment) OS=Mus musculus GN=Dock7 PE=1 SV=1
514	1	Uniprot_Mouse	E9PWA7	25	11161	1	1	1	1	0.44	tr|E9PWA7|E9PWA7_MOUSE Actin-related protein 2/3 complex subunit 4 OS=Mus musculus GN=Arpc4 PE=1 SV=1
515	1	Uniprot_Mouse	A2AWN8	25	63975	1	1	1	1	0.07	tr|A2AWN8|A2AWN8_MOUSE YTH domain family 1, isoform CRA_a OS=Mus musculus GN=Ythdf1 PE=1 SV=1
516	1	Uniprot_Mouse	Q3TTC2	25	42574	1	1	1	1	0.1	sp|Q3TTC2|TYY2_MOUSE Transcription factor YY2 OS=Mus musculus GN=Yy2 PE=2 SV=1
517	1	Uniprot_Mouse	F7C312	24	43563	1	1	1	1	0.1	tr|F7C312|F7C312_MOUSE Endoplasmin (Fragment) OS=Mus musculus GN=Hsp90b1 PE=1 SV=1
518	1	Uniprot_Mouse	B2RRE2	24	233021	2	2	2	2	0.04	tr|B2RRE2|B2RRE2_MOUSE Myo18a protein OS=Mus musculus GN=Myo18a PE=1 SV=1
519	1	Uniprot_Mouse	P01629	24	12327	2	2	1	1	0.4	sp|P01629|KV2A4_MOUSE Ig kappa chain V-II region 2S1.3 OS=Mus musculus PE=1 SV=1
520	1	Uniprot_Mouse	Q91YR1	24	40283	1	1	1	1	0.11	sp|Q91YR1|TWF1_MOUSE Twinfilin-1 OS=Mus musculus GN=Twf1 PE=1 SV=2
521	1	Uniprot_Mouse	Q5XJF6	24	24987	1	1	1	1	0.18	tr|Q5XJF6|Q5XJF6_MOUSE Ribosomal protein OS=Mus musculus GN=Rpl10a PE=1 SV=1
522	1	Uniprot_Mouse	Q8VE73	24	193824	2	2	2	2	0.04	sp|Q8VE73|CUL7_MOUSE Cullin-7 OS=Mus musculus GN=Cul7 PE=1 SV=2
523	1	Uniprot_Mouse	G3UWE1	24	34621	2	2	2	2	0.27	tr|G3UWE1|G3UWE1_MOUSE MCG11048, isoform CRA_c OS=Mus musculus GN=Tecr PE=1 SV=1
524	1	Uniprot_Mouse	A2AQA7	24	163006	1	1	1	1	0.03	tr|A2AQA7|A2AQA7_MOUSE Intron-binding protein aquarius OS=Mus musculus GN=Aqr PE=1 SV=1
525	1	Uniprot_Mouse	Q91Z50	24	42938	1	1	1	1	0.1	tr|Q91Z50|Q91Z50_MOUSE Flap endonuclease 1 OS=Mus musculus GN=Fen1 PE=1 SV=1
526	1	Uniprot_Mouse	P01639	24	14473	1	1	1	1	0.33	sp|P01639|KV5A7_MOUSE Ig kappa chain V-V region MOPC 41 OS=Mus musculus GN=Gm5571 PE=1 SV=1
527	1	Uniprot_Mouse	Q8VDM6	23	96513	1	1	1	1	0.04	sp|Q8VDM6|HNRL1_MOUSE Heterogeneous nuclear ribonucleoprotein U-like protein 1 OS=Mus musculus GN=Hnrnpul1 PE=1 SV=1
528	1	Uniprot_Mouse	Q01149	23	129992	1	1	1	1	0.03	sp|Q01149|CO1A2_MOUSE Collagen alpha-2(I) chain OS=Mus musculus GN=Col1a2 PE=2 SV=2
529	1	Uniprot_Mouse	Q9QYS9	23	37761	1	1	1	1	0.12	sp|Q9QYS9|QKI_MOUSE Protein quaking OS=Mus musculus GN=Qki PE=1 SV=1
530	1	Uniprot_Mouse	G3X999	23	65618	2	2	1	1	0.07	tr|G3X999|G3X999_MOUSE Cilia- and flagella-associated protein 69 (Fragment) OS=Mus musculus GN=Cfap69 PE=4 SV=1
531	1	Uniprot_Mouse	Q60596	23	69271	1	1	1	1	0.06	sp|Q60596|XRCC1_MOUSE DNA repair protein XRCC1 OS=Mus musculus GN=Xrcc1 PE=1 SV=2
532	1	Uniprot_Mouse	A0A075B684	23	3210	1	1	1	1	2.24	tr|A0A075B684|A0A075B684_MOUSE Protein Ighv1-62-1 OS=Mus musculus GN=Ighv1-62-1 PE=4 SV=1
533	1	Uniprot_Mouse	F6TFN2	23	134554	1	1	1	1	0.03	tr|F6TFN2|F6TFN2_MOUSE Protein Lmo7 (Fragment) OS=Mus musculus GN=Lmo7 PE=1 SV=1
534	1	Uniprot_Mouse	Q99PM0	23	21565	1	1	1	1	0.21	tr|Q99PM0|Q99PM0_MOUSE Microfibril-associated glycoprotein 1 OS=Mus musculus GN=Mfap2 PE=2 SV=1
535	1	Uniprot_Mouse	Q2KN98	23	124811	1	1	1	1	0.03	sp|Q2KN98|CYTSA_MOUSE Cytospin-A OS=Mus musculus GN=Specc1l PE=1 SV=1
536	1	Uniprot_Mouse	E9PVQ3	23	64293	1	1	1	1	0.07	tr|E9PVQ3|E9PVQ3_MOUSE SPATS2-like protein OS=Mus musculus GN=Spats2l PE=1 SV=1
537	1	Uniprot_Mouse	F6Q8V7	23	11932	1	1	1	1	0.41	tr|F6Q8V7|F6Q8V7_MOUSE Prohibitin-2 (Fragment) OS=Mus musculus GN=Phb2 PE=1 SV=1
538	1	Uniprot_Mouse	A2A9P6	23	87437	3	3	3	3	0.16	tr|A2A9P6|A2A9P6_MOUSE Cyclin-dependent kinase 11B OS=Mus musculus GN=Cdk11b PE=1 SV=1
539	1	Uniprot_Mouse	Q61048	23	42396	1	1	1	1	0.1	sp|Q61048|WBP4_MOUSE WW domain-binding protein 4 OS=Mus musculus GN=Wbp4 PE=1 SV=4
540	1	Uniprot_Mouse	Q9D0M3	22	35533	2	2	2	2	0.27	sp|Q9D0M3|CY1_MOUSE Cytochrome c1, heme protein, mitochondrial OS=Mus musculus GN=Cyc1 PE=1 SV=1
541	1	Uniprot_Mouse	Q4V9W2	22	18368	3	3	1	1	0.25	sp|Q4V9W2|SR1IP_MOUSE Protein SREK1IP1 OS=Mus musculus GN=Srek1ip1 PE=2 SV=1
542	1	Uniprot_Mouse	Q5SWV3	22	26530	1	1	1	1	0.17	tr|Q5SWV3|Q5SWV3_MOUSE PDZ and LIM domain protein 4 OS=Mus musculus GN=Pdlim4 PE=1 SV=1
543	1	Uniprot_Mouse	A2A5F5	22	9061	3	3	1	1	0.56	tr|A2A5F5|A2A5F5_MOUSE Ras-related protein Rab-5C (Fragment) OS=Mus musculus GN=Rab5c PE=1 SV=1
544	1	Uniprot_Mouse	O08553	22	62638	1	1	1	1	0.07	sp|O08553|DPYL2_MOUSE Dihydropyrimidinase-related protein 2 OS=Mus musculus GN=Dpysl2 PE=1 SV=2
545	1	Uniprot_Mouse	P51174	22	48277	1	1	1	1	0.09	sp|P51174|ACADL_MOUSE Long-chain specific acyl-CoA dehydrogenase, mitochondrial OS=Mus musculus GN=Acadl PE=1 SV=2
546	1	Uniprot_Mouse	P62320	22	14021	1	1	1	1	0.34	sp|P62320|SMD3_MOUSE Small nuclear ribonucleoprotein Sm D3 OS=Mus musculus GN=Snrpd3 PE=1 SV=1
547	1	Uniprot_Mouse	Q8C9E8	22	35674	3	3	1	1	0.13	sp|Q8C9E8|FA26F_MOUSE Protein FAM26F OS=Mus musculus GN=Fam26f PE=2 SV=1
548	1	Uniprot_Mouse	P17918	22	29108	1	1	1	1	0.16	sp|P17918|PCNA_MOUSE Proliferating cell nuclear antigen OS=Mus musculus GN=Pcna PE=1 SV=2
549	1	Uniprot_Mouse	A0A0A6YVV8	22	42433	2	2	2	2	0.22	tr|A0A0A6YVV8|A0A0A6YVV8_MOUSE Muscleblind-like protein 1 OS=Mus musculus GN=Mbnl1 PE=1 SV=1
550	1	Uniprot_Mouse	E9PX70	22	334722	1	1	1	1	0.01	tr|E9PX70|E9PX70_MOUSE Collagen alpha-1(XII) chain OS=Mus musculus GN=Col12a1 PE=1 SV=1
551	1	Uniprot_Mouse	E9PV22	21	66547	1	1	1	1	0.07	tr|E9PV22|E9PV22_MOUSE Leucine-rich repeat-containing protein 47 OS=Mus musculus GN=Lrrc47 PE=1 SV=1
552	1	Uniprot_Mouse	B1AYU4	21	83328	1	1	1	1	0.05	tr|B1AYU4|B1AYU4_MOUSE Pre-mRNA-splicing factor CWC22 homolog OS=Mus musculus GN=Cwc22 PE=1 SV=1
553	1	Uniprot_Mouse	P97927	21	204372	1	1	1	1	0.02	sp|P97927|LAMA4_MOUSE Laminin subunit alpha-4 OS=Mus musculus GN=Lama4 PE=1 SV=2
554	1	Uniprot_Mouse	P51150	21	23760	1	1	1	1	0.19	sp|P51150|RAB7A_MOUSE Ras-related protein Rab-7a OS=Mus musculus GN=Rab7a PE=1 SV=2
555	1	Uniprot_Mouse	Q80VD1	21	45891	1	1	1	1	0.1	sp|Q80VD1|FA98B_MOUSE Protein FAM98B OS=Mus musculus GN=Fam98b PE=2 SV=1
556	1	Uniprot_Mouse	P10605	21	38168	1	1	1	1	0.12	sp|P10605|CATB_MOUSE Cathepsin B OS=Mus musculus GN=Ctsb PE=1 SV=2
557	1	Uniprot_Mouse	D3YXU1	21	19011	1	1	1	1	0.25	tr|D3YXU1|D3YXU1_MOUSE Trifunctional enzyme subunit beta, mitochondrial (Fragment) OS=Mus musculus GN=Hadhb PE=1 SV=1
558	1	Uniprot_Mouse	P47738	21	57015	2	2	2	2	0.16	sp|P47738|ALDH2_MOUSE Aldehyde dehydrogenase, mitochondrial OS=Mus musculus GN=Aldh2 PE=1 SV=1
559	1	Uniprot_Mouse	Q3TML0	21	49058	1	1	1	1	0.09	tr|Q3TML0|Q3TML0_MOUSE Protein disulfide-isomerase A6 OS=Mus musculus GN=Pdia6 PE=1 SV=1
560	1	Uniprot_Mouse	Q61391	21	86332	2	2	2	2	0.1	sp|Q61391|NEP_MOUSE Neprilysin OS=Mus musculus GN=Mme PE=1 SV=3
561	1	Uniprot_Mouse	D3Z1N9	21	17693	1	1	1	1	0.27	tr|D3Z1N9|D3Z1N9_MOUSE MCG9889 OS=Mus musculus GN=Gm10709 PE=4 SV=1
562	1	Uniprot_Mouse	F7CPL2	20	19873	1	1	1	1	0.23	tr|F7CPL2|F7CPL2_MOUSE Drebrin (Fragment) OS=Mus musculus GN=Dbn1 PE=1 SV=1
563	1	Uniprot_Mouse	P09813	20	11359	1	1	1	1	0.44	sp|P09813|APOA2_MOUSE Apolipoprotein A-II OS=Mus musculus GN=Apoa2 PE=1 SV=2
564	1	Uniprot_Mouse	B9EII4	20	52711	1	1	1	1	0.08	tr|B9EII4|B9EII4_MOUSE T-box 1 OS=Mus musculus GN=Tbx1 PE=2 SV=1
565	1	Uniprot_Mouse	Q9D454	20	55671	1	1	1	1	0.08	sp|Q9D454|CX049_MOUSE Uncharacterized protein CXorf49 homolog OS=Mus musculus PE=2 SV=1
566	1	Uniprot_Mouse	A2AMY5	20	118162	1	1	1	1	0.04	tr|A2AMY5|A2AMY5_MOUSE Ubiquitin-associated protein 2 OS=Mus musculus GN=Ubap2 PE=1 SV=1
567	1	Uniprot_Mouse	A2A517	20	52973	1	1	1	1	0.08	tr|A2A517|A2A517_MOUSE Cytohesin-1 (Fragment) OS=Mus musculus GN=Cyth1 PE=1 SV=1
568	1	Uniprot_Mouse	F6QKK2	20	19084	1	1	1	1	0.24	tr|F6QKK2|F6QKK2_MOUSE ADP-ribosylation factor-like protein 8A (Fragment) OS=Mus musculus GN=Arl8a PE=1 SV=1
569	1	Uniprot_Mouse	A2A930	20	140809	1	1	1	1	0.03	tr|A2A930|A2A930_MOUSE PR domain zinc finger protein 16 OS=Mus musculus GN=Prdm16 PE=1 SV=1
570	1	Uniprot_Mouse	Q0VG34	20	46046	1	1	1	1	0.1	tr|Q0VG34|Q0VG34_MOUSE MCG52719 OS=Mus musculus GN=4930480E11Rik PE=2 SV=1
571	1	Uniprot_Mouse	A2AQ53	20	332668	1	1	1	1	0.01	tr|A2AQ53|A2AQ53_MOUSE Fibrillin-1 OS=Mus musculus GN=Fbn1 PE=1 SV=1
572	1	Uniprot_Mouse	Q8BZZ3	20	105426	1	1	1	1	0.04	sp|Q8BZZ3|WWP1_MOUSE NEDD4-like E3 ubiquitin-protein ligase WWP1 OS=Mus musculus GN=Wwp1 PE=1 SV=2
573	1	Uniprot_Mouse	D3YWC0	20	13795	1	1	1	1	0.35	tr|D3YWC0|D3YWC0_MOUSE Uncharacterized protein OS=Mus musculus GN=Gm2178 PE=4 SV=1
574	1	Uniprot_Mouse	A0A0A0MQK6	20	56015	2	2	1	1	0.08	tr|A0A0A0MQK6|A0A0A0MQK6_MOUSE Lethal(3)malignant brain tumor-like protein 4 (Fragment) OS=Mus musculus GN=L3mbtl4 PE=4 SV=1
575	1	Uniprot_Mouse	B1B0C7	20	479445	1	1	1	1	0.01	tr|B1B0C7|B1B0C7_MOUSE Basement membrane-specific heparan sulfate proteoglycan core protein OS=Mus musculus GN=Hspg2 PE=1 SV=1
576	1	Uniprot_Mouse	Q9D8S3	20	57876	2	2	2	2	0.16	sp|Q9D8S3|ARFG3_MOUSE ADP-ribosylation factor GTPase-activating protein 3 OS=Mus musculus GN=Arfgap3 PE=1 SV=2
577	1	Uniprot_Mouse	Z4YL92	20	72649	1	1	1	1	0.06	tr|Z4YL92|Z4YL92_MOUSE Zinc finger matrin-type protein 1 OS=Mus musculus GN=Zmat1 PE=1 SV=1
578	1	Uniprot_Mouse	Q8BW10	20	45834	2	2	2	2	0.2	sp|Q8BW10|NOB1_MOUSE RNA-binding protein NOB1 OS=Mus musculus GN=Nob1 PE=1 SV=1
579	1	Uniprot_Mouse	G5E8T3	19	13783	1	1	1	1	0.35	tr|G5E8T3|G5E8T3_MOUSE Signal recognition particle 19 kDa protein OS=Mus musculus GN=Srp19 PE=1 SV=1
580	1	Uniprot_Mouse	Q8R0W0	19	726989	1	1	1	1	0.01	sp|Q8R0W0|EPIPL_MOUSE Epiplakin OS=Mus musculus GN=Eppk1 PE=1 SV=2
581	1	Uniprot_Mouse	O88712	19	48171	1	1	1	1	0.09	sp|O88712|CTBP1_MOUSE C-terminal-binding protein 1 OS=Mus musculus GN=Ctbp1 PE=1 SV=2
582	1	Uniprot_Mouse	P29788	19	55613	2	2	2	2	0.16	sp|P29788|VTNC_MOUSE Vitronectin OS=Mus musculus GN=Vtn PE=1 SV=2
583	1	Uniprot_Mouse	Q8BGD9	19	68970	1	1	1	1	0.06	sp|Q8BGD9|IF4B_MOUSE Eukaryotic translation initiation factor 4B OS=Mus musculus GN=Eif4b PE=1 SV=1
584	1	Uniprot_Mouse	Q61584	19	76517	2	2	2	2	0.12	sp|Q61584|FXR1_MOUSE Fragile X mental retardation syndrome-related protein 1 OS=Mus musculus GN=Fxr1 PE=1 SV=2
585	1	Uniprot_Mouse	P24549	19	55060	1	1	1	1	0.08	sp|P24549|AL1A1_MOUSE Retinal dehydrogenase 1 OS=Mus musculus GN=Aldh1a1 PE=1 SV=5
586	1	Uniprot_Mouse	E9Q133	19	57004	1	1	1	1	0.08	tr|E9Q133|E9Q133_MOUSE T-complex protein 1 subunit gamma OS=Mus musculus GN=Cct3 PE=1 SV=1
587	1	Uniprot_Mouse	D3YU82	19	133192	2	2	1	1	0.03	tr|D3YU82|D3YU82_MOUSE Probable cation-transporting ATPase 13A5 OS=Mus musculus GN=Atp13a5 PE=3 SV=1
588	1	Uniprot_Mouse	Q9CWK3	19	37785	1	1	1	1	0.12	sp|Q9CWK3|CD2B2_MOUSE CD2 antigen cytoplasmic tail-binding protein 2 OS=Mus musculus GN=Cd2bp2 PE=1 SV=1
589	1	Uniprot_Mouse	Q9DBD5	18	119306	1	1	1	1	0.04	sp|Q9DBD5|PELP1_MOUSE Proline-, glutamic acid- and leucine-rich protein 1 OS=Mus musculus GN=Pelp1 PE=1 SV=2
590	1	Uniprot_Mouse	H3BLI5	18	27242	1	1	1	1	0.17	tr|H3BLI5|H3BLI5_MOUSE Coiled-coil domain-containing protein 137 (Fragment) OS=Mus musculus GN=Ccdc137 PE=1 SV=1
591	1	Uniprot_Mouse	D3Z3N9	18	74521	1	1	1	1	0.06	tr|D3Z3N9|D3Z3N9_MOUSE Neuronal tyrosine-phosphorylated phosphoinositide-3-kinase adapter 2 OS=Mus musculus GN=Nyap2 PE=1 SV=1
592	1	Uniprot_Mouse	Q80X98	18	141333	1	1	1	1	0.03	tr|Q80X98|Q80X98_MOUSE DEAH (Asp-Glu-Ala-His) box polypeptide 38 OS=Mus musculus GN=Dhx38 PE=1 SV=1
593	1	Uniprot_Mouse	P19324	18	46618	1	1	1	1	0.09	sp|P19324|SERPH_MOUSE Serpin H1 OS=Mus musculus GN=Serpinh1 PE=1 SV=3
594	1	Uniprot_Mouse	Q64378	18	51504	1	1	1	1	0.09	sp|Q64378|FKBP5_MOUSE Peptidyl-prolyl cis-trans isomerase FKBP5 OS=Mus musculus GN=Fkbp5 PE=1 SV=1
595	1	Uniprot_Mouse	E9Q9B7	18	200713	1	1	1	1	0.02	tr|E9Q9B7|E9Q9B7_MOUSE Protein Kidins220 OS=Mus musculus GN=Kidins220 PE=1 SV=1
596	1	Uniprot_Mouse	E9PWE8	18	74294	1	1	1	1	0.06	tr|E9PWE8|E9PWE8_MOUSE Dihydropyrimidinase-related protein 3 OS=Mus musculus GN=Dpysl3 PE=1 SV=1
597	1	Uniprot_Mouse	Q5SVR0	18	142716	1	1	1	1	0.03	sp|Q5SVR0|TBC9B_MOUSE TBC1 domain family member 9B OS=Mus musculus GN=Tbc1d9b PE=2 SV=1
598	1	Uniprot_Mouse	G3UZJ2	18	25850	1	1	1	1	0.18	tr|G3UZJ2|G3UZJ2_MOUSE Microtubule-associated protein (Fragment) OS=Mus musculus GN=Map2 PE=1 SV=5
599	1	Uniprot_Mouse	Q80Z09	18	100266	1	1	1	1	0.04	tr|Q80Z09|Q80Z09_MOUSE EC1-V2R pheromone receptor protein OS=Mus musculus GN=Vmn2r81 PE=2 SV=1
600	1	Uniprot_Mouse	G3UW85	18	14574	1	1	1	1	0.33	tr|G3UW85|G3UW85_MOUSE Enhancer of rudimentary homolog OS=Mus musculus GN=Erh PE=1 SV=1
601	1	Uniprot_Mouse	A0A087WQJ5	18	9145	1	1	1	1	0.56	tr|A0A087WQJ5|A0A087WQJ5_MOUSE Protein 1810009A15Rik OS=Mus musculus GN=1810009A15Rik PE=4 SV=1
602	1	Uniprot_Mouse	Q766D5	18	117813	1	1	1	1	0.04	sp|Q766D5|B4GN4_MOUSE N-acetyl-beta-glucosaminyl-glycoprotein 4-beta-N-acetylgalactosaminyltransferase 1 OS=Mus musculus GN=B4galnt4 PE=2 SV=1
603	1	Uniprot_Mouse	Q62418	18	48955	1	1	1	1	0.09	sp|Q62418|DBNL_MOUSE Drebrin-like protein OS=Mus musculus GN=Dbnl PE=1 SV=2
604	1	Uniprot_Mouse	Q3V038	18	24678	1	1	1	1	0.18	sp|Q3V038|TTC9A_MOUSE Tetratricopeptide repeat protein 9A OS=Mus musculus GN=Ttc9 PE=2 SV=1
605	1	Uniprot_Mouse	D3YW09	18	22235	1	1	1	1	0.21	tr|D3YW09|D3YW09_MOUSE Splicing factor 3A subunit 2 OS=Mus musculus GN=Sf3a2 PE=1 SV=1
606	1	Uniprot_Mouse	P57784	18	28454	1	1	1	1	0.16	sp|P57784|RU2A_MOUSE U2 small nuclear ribonucleoprotein A' OS=Mus musculus GN=Snrpa1 PE=1 SV=2
607	1	Uniprot_Mouse	Q9CY97	18	22959	1	1	1	1	0.2	sp|Q9CY97|SSU72_MOUSE RNA polymerase II subunit A C-terminal domain phosphatase SSU72 OS=Mus musculus GN=Ssu72 PE=2 SV=1
608	1	Uniprot_Mouse	P61161	17	45017	1	1	1	1	0.1	sp|P61161|ARP2_MOUSE Actin-related protein 2 OS=Mus musculus GN=Actr2 PE=1 SV=1
609	1	Uniprot_Mouse	Q80X85	17	28216	1	1	1	1	0.16	sp|Q80X85|RT07_MOUSE 28S ribosomal protein S7, mitochondrial OS=Mus musculus GN=Mrps7 PE=2 SV=1
610	1	Uniprot_Mouse	Q14B01	17	38833	1	1	1	1	0.11	tr|Q14B01|Q14B01_MOUSE Protein Rnf113a2 OS=Mus musculus GN=Rnf113a2 PE=1 SV=1
611	1	Uniprot_Mouse	Q922Q1	17	38797	1	1	1	1	0.11	sp|Q922Q1|MARC2_MOUSE Mitochondrial amidoxime reducing component 2 OS=Mus musculus GN=Marc2 PE=1 SV=1
612	1	Uniprot_Mouse	P58501	17	105284	1	1	1	1	0.04	sp|P58501|PAXB1_MOUSE PAX3- and PAX7-binding protein 1 OS=Mus musculus GN=Paxbp1 PE=1 SV=3
613	1	Uniprot_Mouse	Q920Q8	17	72732	1	1	1	1	0.06	sp|Q920Q8|NS1BP_MOUSE Influenza virus NS1A-binding protein homolog OS=Mus musculus GN=Ivns1abp PE=1 SV=2
614	1	Uniprot_Mouse	A2AP18	17	165848	1	1	1	1	0.03	sp|A2AP18|PLCH2_MOUSE 1-phosphatidylinositol 4,5-bisphosphate phosphodiesterase eta-2 OS=Mus musculus GN=Plch2 PE=1 SV=2
615	1	Uniprot_Mouse	G3UZW5	17	27758	1	1	1	1	0.16	tr|G3UZW5|G3UZW5_MOUSE PERQ amino acid-rich with GYF domain-containing protein 2 (Fragment) OS=Mus musculus GN=Gigyf2 PE=1 SV=1
616	1	Uniprot_Mouse	P00329	17	40601	1	1	1	1	0.11	sp|P00329|ADH1_MOUSE Alcohol dehydrogenase 1 OS=Mus musculus GN=Adh1 PE=1 SV=2
617	1	Uniprot_Mouse	D3Z069	17	127838	1	1	1	1	0.03	tr|D3Z069|D3Z069_MOUSE Pleckstrin homology-like domain family B member 2 (Fragment) OS=Mus musculus GN=Phldb2 PE=1 SV=1
618	1	Uniprot_Mouse	A0A0B4J1I1	16	13037	1	1	1	1	0.37	tr|A0A0B4J1I1|A0A0B4J1I1_MOUSE Protein Igkv16-104 OS=Mus musculus GN=Igkv16-104 PE=4 SV=1
619	1	Uniprot_Mouse	Q3URZ6	16	83351	1	1	1	1	0.05	tr|Q3URZ6|Q3URZ6_MOUSE AHNAK nucleoprotein 2 OS=Mus musculus GN=Ahnak2 PE=1 SV=1
620	1	Uniprot_Mouse	D3Z594	16	25296	1	1	1	1	0.18	tr|D3Z594|D3Z594_MOUSE Granzyme K OS=Mus musculus GN=Gzmk PE=3 SV=1
621	1	Uniprot_Mouse	Q8BYR1	16	75989	1	1	1	1	0.06	sp|Q8BYR1|TYW4_MOUSE tRNA wybutosine-synthesizing protein 4 OS=Mus musculus GN=Lcmt2 PE=2 SV=4
622	1	Uniprot_Mouse	P60766	16	21587	2	2	2	2	0.47	sp|P60766|CDC42_MOUSE Cell division control protein 42 homolog OS=Mus musculus GN=Cdc42 PE=1 SV=2
623	1	Uniprot_Mouse	O70503	16	34948	1	1	1	1	0.13	sp|O70503|DHB12_MOUSE Very-long-chain 3-oxoacyl-CoA reductase OS=Mus musculus GN=Hsd17b12 PE=2 SV=1
624	1	Uniprot_Mouse	D3Z0X5	16	159565	1	1	1	1	0.03	tr|D3Z0X5|D3Z0X5_MOUSE Pleckstrin homology-like domain family B member 1 OS=Mus musculus GN=Phldb1 PE=1 SV=1
625	1	Uniprot_Mouse	Q8CIV3	16	51441	1	1	1	1	0.09	sp|Q8CIV3|LIPH_MOUSE Lipase member H OS=Mus musculus GN=Liph PE=2 SV=2
626	1	Uniprot_Mouse	Q8CIM1	16	76736	1	1	1	1	0.06	sp|Q8CIM1|LRC45_MOUSE Leucine-rich repeat-containing protein 45 OS=Mus musculus GN=Lrrc45 PE=2 SV=2
627	1	Uniprot_Mouse	Q6A000	16	109720	1	1	1	1	0.04	sp|Q6A000|K0753_MOUSE Uncharacterized protein KIAA0753 OS=Mus musculus GN=Kiaa0753 PE=2 SV=2
628	1	Uniprot_Mouse	D3Z0Q6	16	77317	1	1	1	1	0.06	tr|D3Z0Q6|D3Z0Q6_MOUSE Glycogen [starch] synthase, muscle OS=Mus musculus GN=Gys1 PE=1 SV=1
629	1	Uniprot_Mouse	A0A0A6YWN4	16	6726	1	1	1	1	0.81	tr|A0A0A6YWN4|A0A0A6YWN4_MOUSE Protein Rbm6 (Fragment) OS=Mus musculus GN=Rbm6 PE=4 SV=1
630	1	Uniprot_Mouse	Q9D9R3	16	28578	1	1	1	1	0.16	sp|Q9D9R3|SPAT9_MOUSE Spermatogenesis-associated protein 9 OS=Mus musculus GN=Spata9 PE=2 SV=1
631	1	Uniprot_Mouse	Q9Z1M8	16	65690	1	1	1	1	0.07	sp|Q9Z1M8|RED_MOUSE Protein Red OS=Mus musculus GN=Ik PE=1 SV=2
632	1	Uniprot_Mouse	Q3U962	16	145955	1	1	1	1	0.03	sp|Q3U962|CO5A2_MOUSE Collagen alpha-2(V) chain OS=Mus musculus GN=Col5a2 PE=1 SV=1
633	1	Uniprot_Mouse	P97868	16	200492	1	1	1	1	0.02	sp|P97868|RBBP6_MOUSE E3 ubiquitin-protein ligase RBBP6 OS=Mus musculus GN=Rbbp6 PE=1 SV=5
634	1	Uniprot_Mouse	Q8C0N1	16	76333	1	1	1	1	0.06	sp|Q8C0N1|KIF2B_MOUSE Kinesin-like protein KIF2B OS=Mus musculus GN=Kif2b PE=1 SV=1
635	1	Uniprot_Mouse	D3Z0A2	16	37114	1	1	1	1	0.12	tr|D3Z0A2|D3Z0A2_MOUSE Protein arginine N-methyltransferase 1 OS=Mus musculus GN=Prmt1 PE=1 SV=1
636	1	Uniprot_Mouse	E0CZA6	16	8744	1	1	1	1	0.59	tr|E0CZA6|E0CZA6_MOUSE DNA repair protein RAD52 homolog OS=Mus musculus GN=Rad52 PE=4 SV=1
637	1	Uniprot_Mouse	S4R2M6	16	9721	1	1	1	1	0.52	tr|S4R2M6|S4R2M6_MOUSE MCG116386, isoform CRA_c OS=Mus musculus GN=Rbm3 PE=1 SV=1
638	1	Uniprot_Mouse	B1AXC8	16	9544	1	1	1	1	0.53	tr|B1AXC8|B1AXC8_MOUSE Coiled-coil-helix-coiled-coil-helix domain-containing protein 7 (Fragment) OS=Mus musculus GN=Chchd7 PE=1 SV=1
639	1	Uniprot_Mouse	Q8BHG9	16	19035	1	1	1	1	0.25	sp|Q8BHG9|CGBP1_MOUSE CGG triplet repeat-binding protein 1 OS=Mus musculus GN=Cggbp1 PE=2 SV=1
640	1	Uniprot_Mouse	P25206	16	92230	1	1	1	1	0.05	sp|P25206|MCM3_MOUSE DNA replication licensing factor MCM3 OS=Mus musculus GN=Mcm3 PE=1 SV=2
641	1	Uniprot_Mouse	A0A0A6YXT1	15	89092	1	1	1	1	0.05	tr|A0A0A6YXT1|A0A0A6YXT1_MOUSE Protein Pcdhga7 OS=Mus musculus GN=Pcdhga7 PE=4 SV=1
642	1	Uniprot_Mouse	Q8R4Y8	15	251865	1	1	1	1	0.02	sp|Q8R4Y8|RTTN_MOUSE Rotatin OS=Mus musculus GN=Rttn PE=2 SV=2
643	1	Uniprot_Mouse	Q99K48	15	54620	1	1	1	1	0.08	sp|Q99K48|NONO_MOUSE Non-POU domain-containing octamer-binding protein OS=Mus musculus GN=Nono PE=1 SV=3
644	1	Uniprot_Mouse	A2A400	15	45173	1	1	1	1	0.1	tr|A2A400|A2A400_MOUSE Wilms tumor protein homolog (Fragment) OS=Mus musculus GN=Wt1 PE=4 SV=1
645	1	Uniprot_Mouse	Q8JZU2	15	34252	1	1	1	1	0.13	sp|Q8JZU2|TXTP_MOUSE Tricarboxylate transport protein, mitochondrial OS=Mus musculus GN=Slc25a1 PE=2 SV=1
646	1	Uniprot_Mouse	Q3TIX9	15	65505	1	1	1	1	0.07	sp|Q3TIX9|SNUT2_MOUSE U4/U6.U5 tri-snRNP-associated protein 2 OS=Mus musculus GN=Usp39 PE=2 SV=2
647	1	Uniprot_Mouse	Q9CPQ1	15	8464	1	1	1	1	0.62	sp|Q9CPQ1|COX6C_MOUSE Cytochrome c oxidase subunit 6C OS=Mus musculus GN=Cox6c PE=1 SV=3
648	1	Uniprot_Mouse	P99027	15	11644	1	1	1	1	0.42	sp|P99027|RLA2_MOUSE 60S acidic ribosomal protein P2 OS=Mus musculus GN=Rplp2 PE=1 SV=3
649	1	Uniprot_Mouse	Q91VP7	15	28992	1	1	1	1	0.16	sp|Q91VP7|TM101_MOUSE Transmembrane protein 101 OS=Mus musculus GN=Tmem101 PE=2 SV=1
650	1	Uniprot_Mouse	Q91X84	15	67213	1	1	1	1	0.06	sp|Q91X84|CRTC3_MOUSE CREB-regulated transcription coactivator 3 OS=Mus musculus GN=Crtc3 PE=2 SV=2
651	1	Uniprot_Mouse	A2AIV2	15	203023	1	1	1	1	0.02	sp|A2AIV2|VIR_MOUSE Protein virilizer homolog OS=Mus musculus GN=Kiaa1429 PE=1 SV=1
652	1	Uniprot_Mouse	O55222	15	51853	1	1	1	1	0.08	sp|O55222|ILK_MOUSE Integrin-linked protein kinase OS=Mus musculus GN=Ilk PE=1 SV=2
653	1	Uniprot_Mouse	A2AR07	15	21456	1	1	1	1	0.21	tr|A2AR07|A2AR07_MOUSE Lupus La protein homolog (Fragment) OS=Mus musculus GN=Ssb PE=1 SV=1
654	1	Uniprot_Mouse	Q8R3X6	15	65268	1	1	1	1	0.07	tr|Q8R3X6|Q8R3X6_MOUSE Glypican 6 OS=Mus musculus GN=Gpc6 PE=1 SV=1
655	1	Uniprot_Mouse	B1ATC3	15	199061	1	1	1	1	0.02	tr|B1ATC3|B1ATC3_MOUSE Trinucleotide repeat-containing gene 6C protein OS=Mus musculus GN=Tnrc6c PE=1 SV=1
656	1	Uniprot_Mouse	A2A953	15	32698	1	1	1	1	0.14	tr|A2A953|A2A953_MOUSE Eyes absent homolog (Fragment) OS=Mus musculus GN=Eya3 PE=1 SV=1
657	1	Uniprot_Mouse	Q8BHL3	15	87791	1	1	1	1	0.05	sp|Q8BHL3|TB10B_MOUSE TBC1 domain family member 10B OS=Mus musculus GN=Tbc1d10b PE=1 SV=2
658	1	Uniprot_Mouse	A2AJA7	15	137082	1	1	1	1	0.03	sp|A2AJA7|AEGP_MOUSE Apical endosomal glycoprotein OS=Mus musculus GN=Mamdc4 PE=3 SV=1
659	1	Uniprot_Mouse	G3X9J6	15	68292	1	1	1	1	0.06	tr|G3X9J6|G3X9J6_MOUSE 5'-nucleotidase, cytosolic II, isoform CRA_b OS=Mus musculus GN=Nt5c2 PE=1 SV=1
660	1	Uniprot_Mouse	Q8BP47	15	65150	1	1	1	1	0.07	sp|Q8BP47|SYNC_MOUSE Asparagine--tRNA ligase, cytoplasmic OS=Mus musculus GN=Nars PE=1 SV=2
661	1	Uniprot_Mouse	Q9QYE6	15	82318	1	1	1	1	0.05	sp|Q9QYE6|GOGA5_MOUSE Golgin subfamily A member 5 OS=Mus musculus GN=Golga5 PE=1 SV=2
662	1	Uniprot_Mouse	M0QW88	15	28722	1	1	1	1	0.16	tr|M0QW88|M0QW88_MOUSE Protein arginine N-methyltransferase 2 OS=Mus musculus GN=Prmt2 PE=4 SV=1
663	1	Uniprot_Mouse	Q8R100	15	36174	1	1	1	1	0.12	sp|Q8R100|FA26E_MOUSE Protein FAM26E OS=Mus musculus GN=Fam26e PE=2 SV=1
664	1	Uniprot_Mouse	Q923D5	15	69831	1	1	1	1	0.06	sp|Q923D5|WBP11_MOUSE WW domain-binding protein 11 OS=Mus musculus GN=Wbp11 PE=1 SV=2
665	1	Uniprot_Mouse	Q8BWU3	15	39465	1	1	1	1	0.11	sp|Q8BWU3|F131A_MOUSE Protein FAM131A OS=Mus musculus GN=Fam131a PE=2 SV=1
666	1	Uniprot_Mouse	H3BK97	15	44897	1	1	1	1	0.1	tr|H3BK97|H3BK97_MOUSE FERM domain-containing protein 4A (Fragment) OS=Mus musculus GN=Frmd4a PE=1 SV=1
667	1	Uniprot_Mouse	G3UX27	14	18497	1	1	1	1	0.25	tr|G3UX27|G3UX27_MOUSE General transcription factor II-I (Fragment) OS=Mus musculus GN=Gtf2i PE=1 SV=1
668	1	Uniprot_Mouse	Q5SX46	14	20973	1	1	1	1	0.22	tr|Q5SX46|Q5SX46_MOUSE Mitochondrial 2-oxoglutarate/malate carrier protein (Fragment) OS=Mus musculus GN=Slc25a11 PE=1 SV=1
669	1	Uniprot_Mouse	P56391	14	10293	1	1	1	1	0.49	sp|P56391|CX6B1_MOUSE Cytochrome c oxidase subunit 6B1 OS=Mus musculus GN=Cox6b1 PE=1 SV=2
670	1	Uniprot_Mouse	D3Z2F7	14	18899	1	1	1	1	0.25	tr|D3Z2F7|D3Z2F7_MOUSE Actin-related protein 2/3 complex subunit 3 OS=Mus musculus GN=Arpc3 PE=1 SV=1
671	1	Uniprot_Mouse	Q9CWL8	14	65395	1	1	1	1	0.07	sp|Q9CWL8|CTBL1_MOUSE Beta-catenin-like protein 1 OS=Mus musculus GN=Ctnnbl1 PE=2 SV=1
672	1	Uniprot_Mouse	Q9DCM7	14	63920	1	1	1	1	0.07	sp|Q9DCM7|NACC2_MOUSE Nucleus accumbens-associated protein 2 OS=Mus musculus GN=Nacc2 PE=2 SV=1
673	1	Uniprot_Mouse	Q9CQU1	14	51923	1	1	1	1	0.08	sp|Q9CQU1|MFAP1_MOUSE Microfibrillar-associated protein 1 OS=Mus musculus GN=Mfap1 PE=1 SV=1
674	1	Student_Contaminants	P06868	14	93894	1	1	1	1	0.05	P06868 SWISS-PROT:P06868 (Bos taurus) Plasminogen precursor
675	1	Uniprot_Mouse	P28659	14	52473	1	1	1	1	0.08	sp|P28659|CELF1_MOUSE CUGBP Elav-like family member 1 OS=Mus musculus GN=Celf1 PE=1 SV=2
676	1	Uniprot_Mouse	Q3UM18	14	73852	1	1	1	1	0.06	sp|Q3UM18|LSG1_MOUSE Large subunit GTPase 1 homolog OS=Mus musculus GN=Lsg1 PE=2 SV=2
